# Supplementary material for: Substituent effects on the [1-closo-CB9H10]− anion geometry: experimental and DFT studies
Source: Royal Society of Chemistry journal article supplement (doi:10.1039/d3ce00357d), 2023-01-01
Supplement: d3ce00357d1.pdf [file d3ce00357d1.pdf]

## Electronic Supplementary Information for

### Substituent effects on the [1-*closo*-CB<sub>9</sub>H<sub>10</sub>]<sup>-</sup> anion geometry: Experimental and DFT studies

Anna Pietrzak,<sup>a\*</sup> Michael J. Carr,<sup>b</sup> and Piotr Kaszynski<sup>c,d,e \*</sup>

<sup>a</sup> Faculty of Chemistry, Łódź University of Technology, Żeromskiego 116, 90-924, Łódź, Poland

<sup>b</sup> School of Chemistry of the University of Leeds, Leeds, UK LS2 9JT, England

<sup>c</sup> Faculty of Chemistry, University of Łódź, 91-403 Łódź, Poland

<sup>d</sup> Centre of Molecular and Macromolecular Studies, Polish Academy of Sciences, 90- 363 Łódź, Poland

<sup>e</sup> Department of Chemistry, Middle Tennessee State University, Murfreesboro, TN, 37132, USA

#### Table of content

|    |                                                                          |      |
|----|--------------------------------------------------------------------------|------|
| 1. | Structure solution and refinement                                        | S 2  |
| 2. | Crystal packing                                                          | S 3  |
| 3. | CSD search results                                                       | S 4  |
| 4. | Experimental and DFT structural parameters for series <b>1</b>           | S 7  |
| 5. | Additional correlations of experimental and DFT structural parameters    | S 9  |
| 6. | Hammett constants used in structural analysis                            | S 14 |
| 7. | Additional correlations of geometrical parameters with Hammett constants | S 15 |
| 8. | Archive for DFT results                                                  | S 16 |
| 9. | References                                                               | S 16 |

## 1. Structure solution and refinement

Single crystal X-ray diffraction measurements for **1l**[PyrCH<sub>2</sub>Cl], **1m**[Et<sub>4</sub>N][Et<sub>4</sub>NBr], **1n**, **1o** and **1q** were performed with a Bruker Nonius Kappa CCD diffractometer. The crystals of **1l**[PyrCH<sub>2</sub>Cl], **1m**[Et<sub>4</sub>N][Et<sub>4</sub>NBr], **1n** and **1q** were kept at 150(2) K during data collection, while measurements for **1o** were conducted at 195(2) K. Data collections were performed using the Mo *K*α radiation ( $\lambda = 0.71073 \text{ \AA}$ ). The data were integrated using DENZO-SMN<sup>1</sup> and COLLECT program.<sup>2</sup> Intensities for absorption were corrected using multi-scan method as implemented in DENZO-SMN. Additional information is listed in Table S1.

All structures were solved with the ShelXS-97<sup>3</sup> structure solution program using direct method and refined in the ShelXL-97<sup>4</sup> by the full-matrix least-squares minimization on  $F^2$ . All non-hydrogen atoms were refined anisotropically. C–H and B–H hydrogens were generated geometrically using the HFIX command in ShelXL.

CCDC: 265347–265351 contain the supplementary crystallographic data for this paper. The data is provided free of charge by The Cambridge Crystallographic Data Centre via [www.ccdc.cam.ac.uk/structures](http://www.ccdc.cam.ac.uk/structures).

**Table S1.** Crystal data and structure refinement

| Identification code                                                                 | <b>1l</b> [PyrCH <sub>2</sub> Cl]                                   | <b>1m</b> [Et <sub>4</sub> N][Et <sub>4</sub> NBr]                               | <b>1n</b>                                                          | <b>1o</b>                                                           | <b>1q</b>                                                         |
|-------------------------------------------------------------------------------------|---------------------------------------------------------------------|----------------------------------------------------------------------------------|--------------------------------------------------------------------|---------------------------------------------------------------------|-------------------------------------------------------------------|
| CCDC:                                                                               | 265347                                                              | 265348                                                                           | 265349                                                             | 265350                                                              | 265351                                                            |
| Formula                                                                             | C <sub>7</sub> H <sub>16</sub> B <sub>9</sub> Cl <sub>2</sub> N     | C <sub>46</sub> H <sub>110</sub> B <sub>18</sub> Br <sub>2</sub> N <sub>10</sub> | C <sub>3</sub> H <sub>15</sub> B <sub>9</sub> S                    | C <sub>6</sub> H <sub>14</sub> B <sub>9</sub> N                     | CH <sub>8</sub> B <sub>9</sub> IN <sub>2</sub>                    |
| Formula weight                                                                      | 282.4                                                               | 1157.84                                                                          | 180.5                                                              | 197.47                                                              | 272.28                                                            |
| Size /mm                                                                            | 0.50x0.33x0.13                                                      | 0.66x0.23x0.07                                                                   | 0.30x0.17x0.03                                                     | 0.59x0.26x0.07                                                      | 0.20x0.17x0.07                                                    |
| Crystal colour                                                                      | yellow                                                              | yellow                                                                           | colourless                                                         | colourless                                                          | yellow                                                            |
| Crystal shape                                                                       | prism                                                               | prism                                                                            | prism                                                              | needle                                                              | block                                                             |
| Wavelength                                                                          | 0.71073                                                             | 0.71073                                                                          | 0.71073                                                            | 0.71073                                                             | 0.71073                                                           |
| Crystal system                                                                      | Monoclinic                                                          | Triclinic                                                                        | Triclinic                                                          | Monoclinic                                                          | Monoclinic                                                        |
| Space group                                                                         | <i>P</i> 2 <sub>1</sub>                                             | <i>P</i> $\bar{1}$                                                               | <i>P</i> $\bar{1}$                                                 | <i>P</i> 2 <sub>1</sub> / <i>c</i>                                  | <i>Cc</i>                                                         |
| <i>a</i> /Å                                                                         | 9.9849(2)                                                           | 9.0602(1)                                                                        | 6.4442(5)                                                          | 10.1476(4)                                                          | 16.2967(5)                                                        |
| <i>b</i> /Å                                                                         | 14.3250(3)                                                          | 16.8803(1)                                                                       | 8.1244(7)                                                          | 10.8518(5)                                                          | 6.5799(3)                                                         |
| <i>c</i> /Å                                                                         | 10.8831(2)                                                          | 22.9672(2)                                                                       | 10.6645(8)                                                         | 13.7392(6)                                                          | 11.8991(5)                                                        |
| $\alpha$ /°                                                                         | 90                                                                  | 104.577(5)                                                                       | 85.078(5)                                                          | 90                                                                  | 90                                                                |
| $\beta$ /°                                                                          | 102.415(1)                                                          | 92.623(4)                                                                        | 82.012(5)                                                          | 130.476(3)                                                          | 126.545(3)                                                        |
| $\gamma$ /°                                                                         | 90                                                                  | 90.179(5)                                                                        | 74.701(3)                                                          | 90                                                                  | 90                                                                |
| Volume /Å <sup>3</sup>                                                              | 1520.25(5)                                                          | 3395.56(5)                                                                       | 532.62(7)                                                          | 1150.87(9)                                                          | 1025.08(7)                                                        |
| <i>Z</i>                                                                            | 4                                                                   | 2                                                                                | 2                                                                  | 4                                                                   | 4                                                                 |
| D <sub>calc</sub> /g cm <sup>-3</sup>                                               | 1.234                                                               | 1.132                                                                            | 1.125                                                              | 1.140                                                               | 1.764                                                             |
| Abs. coefficient /mm <sup>-1</sup>                                                  | 0.401                                                               | 1.232                                                                            | 0.239                                                              | 0.055                                                               | 3.061                                                             |
| <i>F</i> (000)                                                                      | 576                                                                 | 1232                                                                             | 188                                                                | 408                                                                 | 504                                                               |
| $\theta$ range for data collection /°                                               | 2.51 to 27.49                                                       | 2.89 to 26                                                                       | 2.6 to 26                                                          | 3.24 to 26                                                          | 3.47 to 26                                                        |
| Index ranges                                                                        | -12 ≤ <i>h</i> ≤ 12,<br>-18 ≤ <i>k</i> ≤ 17,<br>-13 ≤ <i>l</i> ≤ 14 | -11 ≤ <i>h</i> ≤ 11,<br>-20 ≤ <i>k</i> ≤ 19,<br>-28 ≤ <i>l</i> ≤ 28              | -7 ≤ <i>h</i> ≤ 7,<br>-10 ≤ <i>k</i> ≤ 10,<br>-12 ≤ <i>l</i> ≤ 13  | -12 ≤ <i>h</i> ≤ 12,<br>-13 ≤ <i>k</i> ≤ 13,<br>-16 ≤ <i>l</i> ≤ 16 | -20 ≤ <i>h</i> ≤ 19,<br>-8 ≤ <i>k</i> ≤ 8,<br>-14 ≤ <i>l</i> ≤ 14 |
| No. of measured, independent, and observed [ <i>I</i> > 2σ( <i>I</i> )] reflections | 17724, 6746, 5817                                                   | 42246, 13239, 10459                                                              | 8951, 2065, 1606                                                   | 9290, 2200, 1843                                                    | 8689, 1990, 1782                                                  |
| <i>R</i> <sub>int</sub>                                                             | 0.0759                                                              | 0.1058                                                                           | 0.1359                                                             | 0.1109                                                              | 0.0776                                                            |
| Abs. correction                                                                     | multi-scan                                                          | multi-scan                                                                       | multi-scan                                                         | multi-scan                                                          | multi-scan                                                        |
| Data / restraints / parameters                                                      | 6746 / 1 / 471                                                      | 13239 / 0 / 853                                                                  | 2065 / 0 / 120                                                     | 2200 / 0 / 159                                                      | 1990 / 2 / 118                                                    |
| Goodness of fit                                                                     | 1.04                                                                | 1.02                                                                             | 1.23                                                               | 1.02                                                                | 1.08                                                              |
| Final <i>R</i> indices [ <i>I</i> > 2σ( <i>I</i> )]                                 | <i>R</i> <sub>1</sub> = 0.0482,<br><i>wR</i> <sub>2</sub> = 0.1184  | <i>R</i> <sub>1</sub> = 0.0579<br><i>wR</i> <sub>2</sub> = 0.1417                | <i>R</i> <sub>1</sub> = 0.0995<br><i>wR</i> <sub>2</sub> = 0.288   | <i>R</i> <sub>1</sub> = 0.0564<br><i>wR</i> <sub>2</sub> = 0.1502   | <i>R</i> <sub>1</sub> = 0.0345<br><i>wR</i> <sub>2</sub> = 0.0834 |
| <i>R</i> indices (all data)                                                         | <i>R</i> <sub>1</sub> = 0.0591,<br><i>wR</i> <sub>2</sub> = 0.125   | <i>R</i> <sub>1</sub> = 0.0754,<br><i>wR</i> <sub>2</sub> = 0.1563               | <i>R</i> <sub>1</sub> = 0.1233,<br><i>wR</i> <sub>2</sub> = 0.3007 | <i>R</i> <sub>1</sub> = 0.0662,<br><i>wR</i> <sub>2</sub> = 0.1613  | <i>R</i> <sub>1</sub> = 0.041,<br><i>wR</i> <sub>2</sub> = 0.087  |
| Largest diff. peak and hole /eÅ <sup>-3</sup>                                       | 0.384 and -0.428                                                    | 0.734 and -0.713                                                                 | 1.091 and -0.597                                                   | 0.261 and -0.219                                                    | 0.337 and -1.684                                                  |
| Absolute structure parameter                                                        | 0.65(5)                                                             | -                                                                                | -                                                                  | -                                                                   | -0.03(5)                                                          |

## 2. Crystal packing

**Table S2.** Geometrical parameters for selected short intermolecular contacts. Atom numbers are given as in CIF files.

|                                                              | Contact           | Distance, Å | Distance-VdW, Å |
|--------------------------------------------------------------|-------------------|-------------|-----------------|
| <b>Structure<br/>1l[PyrCH<sub>2</sub>Cl]</b>                 | C11'···B10        | 3.711       | -0.039          |
|                                                              | C16'-H16'···B6    | 2.906       | -0.294          |
|                                                              | C16'-H16'···B6    | 2.993       | -0.207          |
|                                                              | C12-H12···B9'     | 2.725       | -0.475          |
|                                                              | C17-H17A···B8     | 3.074       | -0.126          |
|                                                              | C17-H17A···B10    | 3.024       | -0.176          |
|                                                              | C17'-H7A'···B6'   | 2.887       | -0.313          |
|                                                              | C17'-H7A'···B7'   | 2.670       | -0.530          |
|                                                              | C12-H12···B6'     | 2.766       | -0.434          |
|                                                              | C17'-H7A'···B10'  | 2.670       | -0.516          |
|                                                              | C12-H12···B2'     | 2.971       | -0.229          |
|                                                              | N19-H19A···Br20   | 2.511       | -0.539          |
|                                                              | N19'-H19D···Br20  | 2.541       | -0.509          |
| N19-H19B···Br21                                              | 2.534             | -0.516      |                 |
| <b>Structure<br/>1m[Et<sub>4</sub>N]·[Et<sub>4</sub>NBr]</b> | C33-H33B···Br20   | 2.914       | -0.136          |
|                                                              | C41-H41B···Br20   | 2.900       | -0.150          |
|                                                              | C48-H48A···Br20   | 2.907       | -0.143          |
|                                                              | C19-H19A···Br20   | 2.511       | -0.539          |
|                                                              | C19'-H19D···Br20  | 2.541       | -0.509          |
|                                                              | C43-H43B···Br21   | 2.878       | -0.172          |
|                                                              | C61-H61A···B2     | 2.667       | -0.533          |
|                                                              | C83-H83B···B3     | 2.933       | -0.267          |
| C83-H83B···B6                                                | 2.942             | -0.258      |                 |
| <b>Structure<br/>1n</b>                                      | C12-H12B···B6     | 2.982       | -0.218          |
|                                                              | C12-H12B···B10    | 3.085       | -0.115          |
|                                                              | S11···B9          | 3.736       | -0.064          |
|                                                              | S11···B10         | 3.635       | -0.165          |
|                                                              | C13-H13B···B9     | 3.126       | -0.074          |
| <b>Structure<br/>1o</b>                                      | C13-H13···B9      | 2.931       | -0.269          |
|                                                              | C13-H13···B10     | 2.896       | -0.304          |
|                                                              | N16-H16···B6      | 2.781       | -0.419          |
|                                                              | N16-H16···B10     | 2.942       | -0.258          |
|                                                              | B6-H6···B5        | 3.134       | -0.066          |
|                                                              | C15( $\pi$ )···B5 | 3.585       | -0.115          |
|                                                              | C15( $\pi$ )···B7 | 3.534       | -0.166          |
|                                                              | C14( $\pi$ )···B8 | 3.636       | -0.064          |
| C15( $\pi$ )···B8                                            | 3.541             | -0.159      |                 |
| <b>Structure<br/>1q</b>                                      | B5-H5···I10       | 3.166       | -0.014          |
|                                                              | B2···B7           | 3.964       | -0.036          |
|                                                              | C2-H2···B7        | 3.164       | -0.036          |

### 3. CSD search results

**Table S3.** Results of CSD (Cambridge Structural Database) search for derivatives of the [1-*closo*-CB<sub>9</sub>H<sub>10</sub>]<sup>-</sup> anion and its apical derivatives in series **1**. Filters used: 3D coordinates determined; No errors; Only organic substituents; Only single crystal structures.

| Structure Diagram                                                                                                                                              | CSD Refcode and Reference                                                                                                     |
|----------------------------------------------------------------------------------------------------------------------------------------------------------------|-------------------------------------------------------------------------------------------------------------------------------|
|  <p>Y—C—X<br/>Y=H X=Any</p>                                                   |                                                                                                                               |
|  <p><b>1a</b></p>                                                             | JOXCUU<br><i>K.Nestor, B.Stibr, J.D.Kennedy, M.Thornton-Pett, T.Jelinek (1992) Collect.Czech.Chem.Comm.,57,1262</i>           |
|  <p><b>1a[MgL<sub>3</sub>]</b></p>                                            | LATRUW<br><i>S.G.McArthur, Rahul Jay, Linxiao Geng, Juchen Guo, V.Lavallo (2017) Chem.Commun. ,53,4453</i>                    |
|  <p><b>1b</b></p>                                                             | RUHZEZ<br><i>B.Stibr, J.Pleseck, T.Jelinek, J.D.Kennedy, M.Thornton-Pett (1997) J.Chem.Soc.,Dalton Trans. ,4231</i>           |
|  <p>[NEt<sub>4</sub>]<sup>+</sup> <b>1c[Et<sub>4</sub>N]</b></p>            | NEPKOI<br><i>T.Jelinek, C.A.Kilner, M.Thornton-Pett, J.D.Kennedy (2001) Chem.Commun ,1790</i>                                 |
|  <p><b>1c</b></p>                                                           | WUKCOU<br><i>S.L.Renard, A.Franken, C.A.Kilner, J.D.Kennedy, M.A.Halcrow (2002) New J.Chem.,26,1634</i>                       |
|  <p><b>1c</b></p>                                                           | GOLTOS<br><i>S.L.Renard, A.Franken, J.D.Kennedy, C.A.Kilner, M.A.Halcrow (2010) CSD Communication (Private Communication)</i> |
|  <p>[N(CH<sub>2</sub>)<sub>6</sub>Et<sub>4</sub>]<sup>+</sup> <b>1d</b></p> | WECVAD<br><i>V.I.Bragin, A.A.Korlyukov, P.V.Petrovskii, I.B.Sivaev, V.I.Bregadze (2012) J.Fluorine Chem.,142,14</i>           |
|  <p>[N(CH<sub>2</sub>)<sub>6</sub>Et<sub>4</sub>]<sup>+</sup> <b>1e</b></p> | JATMIB<br><i>I.B.Sivaev, Z.A.Starikova, P.V.Petrovskii, V.I.Bregadze, S.Sjoberg (2005) J.Organomet.Chem.,690,2790</i>         |
|  <p>[NEt<sub>4</sub>]<sup>+</sup> <b>1f</b></p>                             | JAHNUC<br><i>A.Franken, M.J.Carr, W.Clegg, C.A.Kilner, J.D.Kennedy (2004) Dalton Trans.,3552</i>                              |

|                                                                                                                                                                                        |                                                                                                                                                        |
|----------------------------------------------------------------------------------------------------------------------------------------------------------------------------------------|--------------------------------------------------------------------------------------------------------------------------------------------------------|
| 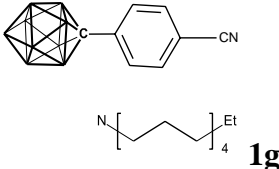 <p style="text-align: center;"><b>1g</b></p>                                                         | <p>DEKNUG<br/> <i>A.V.Shmalko, K.Yu.Suponitsky, I.B.Sivaev, V.I.Bregadze (2022) Izv.Akad.Nauk SSSR, Ser.Khim.(Russ.)(Russ.Chem.Bull.) ,71, 399</i></p> |
|  <p style="text-align: center;"><b>1h</b></p>                                                         | <p>JAHPEO<br/> <i>A.Franken, M.J.Carr, W.Clegg, C.A.Kilner, J.D.Kennedy (2004) Dalton Trans.,3552</i></p>                                              |
|  <p style="text-align: center;"><b>1i</b></p>                                                         | <p>AKABOD<br/> <i>A.Franken, C.A.Kilner, J.D.Kennedy (2003) Inorg.Chem.Commun.,6,1104</i></p>                                                          |
|  <p style="text-align: center;"><b>1j</b></p>                                                         | <p>GIJMUK<br/> <i>X. Liang, Y. Shen, K. Zhang, J. Liu, S. Duttwyler (2018) Chem.Commun.,54,12451</i></p>                                               |
|  <p style="text-align: center;"><b>1k</b></p>                                                         | <p>JAHPOY<br/> <i>A.Franken, M.J.Carr, W.Clegg, C.A.Kilner, J.D.Kennedy (2004) Dalton Trans.,3552</i></p>                                              |
|  <p style="text-align: center;"><b>[N(CH<sub>2</sub>)<sub>6</sub>Et<sub>4</sub>]<sup>+</sup></b></p>  | <p>WECTUV<br/> <i>V.I.Bragin, A.A.Korlyukov, P.V.Petrovskii, I.B.Sivaev, V.I.Bregadze (2012) J.Fluorine Chem.,142,14</i></p>                           |
|                                                                                                     | <p>AKABET<br/> <i>A.Franken, C.A.Kilner, J.D.Kennedy (2003) Inorg.Chem.Commun.,6,1104</i></p>                                                          |
|                                                                                                     | <p>AKABIX<br/> <i>A.Franken, C.A.Kilner, J.D.Kennedy (2003) Inorg.Chem.Commun.,6,1104</i></p>                                                          |
|  <p style="text-align: center;"><b>[NEt<sub>4</sub>]<sup>+</sup></b></p> <p>CH<sub>3</sub>COOMe</p> | <p>JAHPUA<br/> <i>A.Franken, M.J.Carr, W.Clegg, C.A.Kilner, J.D.Kennedy (2004) Dalton Trans.,3552</i></p>                                              |
|  <p style="text-align: center;"><b>[NEt<sub>4</sub>]<sup>+</sup></b></p>                            | <p>JAHQAL<br/> <i>A.Franken, M.J.Carr, W.Clegg, C.A.Kilner, J.D.Kennedy (2004) Dalton Trans.,3552</i></p>                                              |
|  <p style="text-align: center;"><b>[NEt<sub>4</sub>]<sup>+</sup></b></p>                            | <p>ILITUS<br/> <i>N.J.Bullen, A.Franken, C.A.Kilner, J.D.Kennedy (2003) Chem.Commun. ,1684</i></p>                                                     |
|  <p style="text-align: center;">Y = F, Cl, Br, I X = Any</p>                                        |                                                                                                                                                        |
|  <p style="text-align: center;"><b>1p</b></p>                                                       | <p>AWIMEY<br/> <i>A.Franken, C.A.Kilner, M.Thornton-Pett, J.D.Kennedy (2002) Collect.Czech.Chem.Comm.,67,869</i></p>                                   |

|                                                                                                                                                              |                                                                                                                                |
|--------------------------------------------------------------------------------------------------------------------------------------------------------------|--------------------------------------------------------------------------------------------------------------------------------|
| 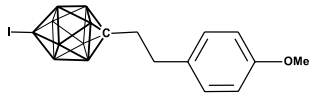 <p style="text-align: center;"><b>1v</b> [NEt<sub>4</sub>]<sup>+</sup></p> | <p>FUZROK</p> <p><i>P.Kaszynski, R.Jakubowski, A.Pietrzak, A.C.Friedli (2020) Chem.-Eur.J.,26, 17481</i></p>                   |
|  <p style="text-align: center;"><b>1u</b></p>                               | <p>FUZRIE</p> <p><i>P.Kaszynski, R.Jakubowski, A.Pietrzak, A.C.Friedli (2020) Chem.-Eur.J.,26, 17481</i></p>                   |
|  <p>Y=Any(except H, F, Cl, Br, I) X=Any</p>                                 |                                                                                                                                |
|  <p style="text-align: center;"><b>1r</b></p>                               | <p>WAJKEZ</p> <p><i>B.Ringstrand, P.Kaszynski, V.G.Young Junior, Z.Janosuek (2010) Inorg.Chem.,49,1166</i></p>                 |
|  <p style="text-align: center;"><b>1s</b></p>                               | <p>WAJKAV</p> <p><i>B.Ringstrand, P.Kaszynski, V.G.Young Junior, Z.Janosuek (2010) Inorg.Chem.,49,1166</i></p>                 |
|  <p style="text-align: center;"><b>1t</b></p>                               | <p>WAJKID</p> <p><i>B.Ringstrand, P.Kaszynski, V.G.Young Junior, Z.Janosuek (2010) Inorg.Chem.,49,1166</i></p>                 |
|  <p style="text-align: center;"><b>1w</b></p>                              | <p>UFONOV</p> <p><i>R.Zurawinski, R.Jakubowski, S.Domagala, P.Kaszynski, K.Wozniak (2018) Inorg.Chem.,57,10442</i></p>         |
|  <p style="text-align: center;"><b>1x</b></p>                             | <p>UFOPAJ</p> <p><i>R.Żurawinski, R.Jakubowski, S.Domagala, P.Kaszynski, K.Wozniak (2018) Inorg.Chem.,57,10442</i></p>         |
|  <p style="text-align: center;"><b>1y</b></p>                             | <p>UFOPEN</p> <p><i>R.Zurawinski, R.Jakubowski, S.Domagala, P.Kaszynski, K.Wozniak (2018) Inorg.Chem.,57,10442</i></p>         |
|                                                                           | <p>SUJNOB</p> <p><i>B.Ringstrand, P.Kaszynski, A.Januszko, V.G.Young Junior (2009) J.Mater.Chem.,19,9204</i></p>               |
|                                                                           | <p>EMEQEV</p> <p><i>R.Jakubowski, J.Pecyna, M.O.Ali, A.Pietrzak, A.C.Friedli, P.Kaszynski (2021) Dalton Trans.,50,3671</i></p> |
|                                                                           | <p>EMEQIZ</p> <p><i>R.Jakubowski, J.Pecyna, M.O.Ali, A.Pietrzak, A.C.Friedli, P.Kaszynski (2021) Dalton Trans.,50,3671</i></p> |

A total of 19 structures were selected for further analysis, mainly on the basis of simplicity of the substituents that could be effectively modeled with DFT methods and for which Hammett parameters are available. Also among three structures containing the 1-closo-CB<sub>9</sub>H<sub>9</sub>-1-Ph]<sup>-</sup> anion, structure **1c**[Et<sub>4</sub>N] (NEPKOI)<sup>5</sup> was selected. Likewise, more recent structure **1a**[MgL<sub>3</sub>] (LATRUW)<sup>6</sup> was selected for further studies.

#### 4. Experimental and DFT structural parameters for series 1.

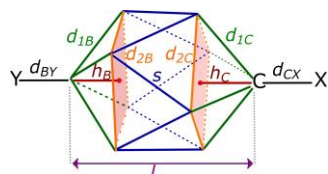

**Figure S1.** The structural model of the {*closo*-1-CB<sub>9</sub>} skeleton in derivatives **1** with defined geometrical parameters.

Parameters  $d_{1B}$ ,  $d_{2B}$ ,  $s$ ,  $d_{2C}$ , and  $d_{1C}$  are mean values of the equivalent bond lengths, 4 for all parameters except for  $s$ , which is an average of 8 values. For each average there is standard deviations given in parenthesis. Parameters  $h_B$ ,  $h_C$ ,  $d_{CX}$  and  $d_{CY}$  are unique values.

The torsion angles  $\theta_X$  and  $\theta_Y$  for the description of conformational properties are taken as absolute values and are defined for each class of derivatives shown in Figure S2 as shown below.

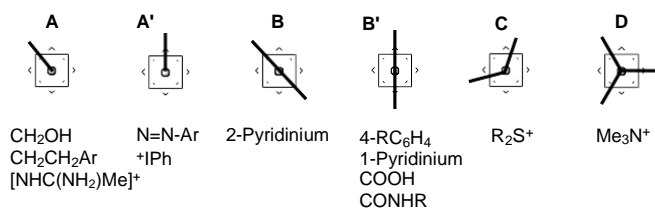

**Figure S2.** Conformational ground states for four types of substituents determined by DFT computational methods.

|                                                                                                        |                               |
|--------------------------------------------------------------------------------------------------------|-------------------------------|
| Class <b>A</b> : for substituent X at the C(1), $\theta_X$ defined by                                  | $X_a-X_a-C(1)-B(2)$ atoms     |
| for substituent Y at the B(10), $\theta_Y$ defined by                                                  | $Y_b-Y_b-B(10)-B(9)$ atoms    |
| Class <b>A'</b> : for substituent X at the C(1), $\theta_X$ defined by                                 | $X_a-X_a-C(1)-B(6)$ atoms     |
| for substituent Y at the B(10), $\theta_Y$ defined by                                                  | $Y_b-Y_b-B(10)-B(2)$ atoms    |
| Class <b>B</b> : for substituent X at the C(1), $\theta_X$ defined by an average of two related values |                               |
| $\theta_X = \frac{1}{2}( \theta_X'  +  \theta_X'' )$                                                   |                               |
| $\theta_X'$ defined by                                                                                 | $X_b'-X_a'-C(1)-B(2)$ atoms   |
| $\theta_X''$ defined by                                                                                | $X_b''-X_a''-C(1)-B(4)$ atoms |



for substituent Y at the B(10),  $\theta_Y$  defined by an average of two related values

$$\theta_Y = \frac{1}{2}(|\theta_{Y'}| + |\theta_{Y''}|)$$

$\theta_{Y'}$  defined by  $Y_b' - Y_a' - B(10) - B(9)$  atoms

$\theta_{Y''}$  defined by  $Y_b'' - Y_a'' - B(10) - B(7)$  atoms

Class **B'**: for substituent X at the C(1),  $\theta_X$  defined by an average of two related values

$$\theta_X = \frac{1}{2}(|\theta_{X'}| + |\theta_{X''}|)$$

$\theta_{X'}$  defined by  $X_b' - X_a' - C(1) - B(6)$  atoms

$\theta_{X''}$  defined by  $X_b'' - X_a'' - C(1) - B(8)$  atoms

for substituent Y at the B(10),  $\theta_Y$  defined by an average of two related values

$$\theta_Y = \frac{1}{2}(|\theta_{Y'}| + |\theta_{Y''}|)$$

$\theta_{Y'}$  defined by  $Y_b' - Y_a' - B(10) - B(5)$  atoms

$\theta_{Y''}$  defined by  $Y_b'' - Y_a'' - B(10) - B(3)$  atoms

Class **C**: for substituent X at the C(1),  $\theta_X$  defined by a difference of two related values

$$\theta_X = |\theta_{X'}| - |\theta_{X''}|$$

$\theta_{X'}$  defined by  $X_b' - X_a' - C(1) - B(2)$  atoms

$\theta_{X''}$  defined by  $X_b'' - X_a'' - C(1) - B(2)$  atoms

for substituent Y at the B(10),  $\theta_Y$  defined by an average of two related values

$$\theta_Y = |\theta_{Y'}| - |\theta_{Y''}|$$

$\theta_{Y'}$  defined by  $Y_b' - Y_a' - B(10) - B(9)$  atoms

$\theta_{Y''}$  defined by  $Y_b'' - Y_a'' - B(10) - B(9)$  atoms

Class **D**: for substituent X at the C(1),  $\theta_X$  defined by  $X_b - X_a - C(1) - B(2)$  atoms

for substituent Y at the B(10),  $\theta_Y$  defined by  $Y_b - Y_a - B(10) - B(9)$  atoms

The results are shown in Table S4 for experimental data and in Table S5 for DFT-optimized geometries.

**Table S4.** Experimental structural parameters (Figures S1 and S2) describing the geometry of the {*closo*-1-CB<sub>9</sub>} cluster.

| Experimental parameters                                                          |           |           |       |           |       |          |           |       |          |          |                   |                      |
|----------------------------------------------------------------------------------|-----------|-----------|-------|-----------|-------|----------|-----------|-------|----------|----------|-------------------|----------------------|
|                                                                                  | $d_{1B}$  | $d_{2B}$  | $h_B$ | $s$       | $h_C$ | $d_{2C}$ | $d_{1C}$  | $l$   | $d_{CX}$ | $d_{BY}$ | $\Theta_X$        | $\Theta_Y$           |
| <b>1a</b><br>LATRUW                                                              | 1.697(3)  | 1.839(6)  | 1.090 | 1.805(4)  | 0.933 | 1.834(2) | 1.597(4)  | 3.529 | 0.97     | 1.1200   | ...               | ...                  |
| <b>1b</b><br>RUHZEZ                                                              | 1.697(1)  | 1.839(8)  | 1.090 | 1.801(1)  | 0.937 | 1.846(6) | 1.607(4)  | 3.526 | 1.501    | 1.1160   | 0.0               | ...                  |
| <b>1c</b><br>NEPKOI                                                              | 1.698(3)  | 1.837(4)  | 1.094 | 1.808(4)  | 0.943 | 1.838(4) | 1.606(5)  | 3.546 | 1.503    | 1.1210   | 9.1 <sup>a</sup>  | ...                  |
| <b>1d</b><br>WECVAD                                                              | 1.69(7)   | 1.81(1)   | 1.101 | 1.77(2)   | 0.947 | 1.89(5)  | 1.62(2)   | 3.508 | 1.477    | 1.061    | 7.6 <sup>a</sup>  | ...                  |
| <b>1e</b><br>JATMIB                                                              | 1.693(7)  | 1.832(4)  | 1.091 | 1.808(9)  | 0.948 | 1.834(6) | 1.606(4)  | 3.550 | 1.494    | 1.1320   | 13.5 <sup>a</sup> | ...                  |
| <b>1f</b><br>JAHNUC                                                              | 1.698(5)  | 1.838(2)  | 1.093 | 1.801(8)  | 0.948 | 1.84(1)  | 1.608(5)  | 3.543 | 1.492    | 1.1200   | 1.3 <sup>a</sup>  | ...                  |
| <b>1g</b><br>DEKNUG                                                              | 1.702(3)  | 1.840(5)  | 1.097 | 1.807(3)  | 0.959 | 1.845(6) | 1.619(5)  | 3.564 | 1.481    | 1.09     | 1.7 <sup>a</sup>  | ...                  |
| <b>1h</b><br>JAHPEO                                                              | 1.71(2)   | 1.845(8)  | 1.101 | 1.811(9)  | 0.934 | 1.86(1)  | 1.613(5)  | 3.543 | 1.484    | 1.1200   | 0.0 <sup>a</sup>  | ...                  |
| <b>1i</b><br>AKABOD                                                              | 1.704(2)  | 1.844(2)  | 1.097 | 1.807(3)  | 0.945 | 1.847(6) | 1.612(4)  | 3.547 | 1.477    | 1.1200   | 6.2 <sup>a</sup>  | ...                  |
| <b>1j</b><br>GIJMUJ                                                              | 1.69(1)   | 1.83(1)   | 1.085 | 1.797(9)  | 0.944 | 1.836(7) | 1.605(3)  | 3.527 | 1.486    | 1.1260   | 37.3 <sup>a</sup> | ...                  |
| <b>1k</b><br>JAHPOY                                                              | 1.697(2)  | 1.8339(4) | 1.095 | 1.804(6)  | 0.944 | 1.836(4) | 1.605(1)  | 3.545 | 1.522    | 1.1195   | 47 <sup>b</sup>   | ...                  |
| <b>1l</b> [PyrCH <sub>2</sub> Cl]                                                | 1.701(2)  | 1.843(2)  | 1.093 | 1.805(4)  | 0.924 | 1.850(3) | 1.602(4)  | 3.520 | 1.741    | 1.0650   | ...               | ...                  |
| <b>1m</b> [Et <sub>3</sub> N] <sup>+</sup><br>[Et <sub>3</sub> NBr] <sup>-</sup> | 1.691(4)  | 1.832(3)  | 1.087 | 1.806(4)  | 0.932 | 1.84(1)  | 1.603(3)  | 3.526 | 1.441    | 1.1195   | 4.8 <sup>a</sup>  | ...                  |
| <b>1n</b>                                                                        | 1.695(5)  | 1.848(4)  | 1.080 | 1.800(4)  | 0.941 | 1.858(8) | 1.616(5)  | 3.515 | 1.765    | 1.1200   | 8.3 <sup>c</sup>  | ...                  |
| <b>1o</b>                                                                        | 1.699(4)  | 1.841(2)  | 1.091 | 1.801(5)  | 0.943 | 1.85(1)  | 1.611(2)  | 3.533 | 1.466    | 1.1480   | 27.0 <sup>a</sup> | ...                  |
| <b>1p</b><br>AWIMEY                                                              | 1.692(5)  | 1.849(3)  | 1.074 | 1.8043(8) | 0.950 | 1.845(4) | 1.614(2)  | 3.526 | 1.486    | 2.1630   | 1.1 <sup>a</sup>  | ...                  |
| <b>1q</b>                                                                        | 1.69(1)   | 1.864(7)  | 1.056 | 1.804(6)  | 0.929 | 1.896(5) | 1.622(3)  | 3.458 | 1.385    | 2.1490   | ...               | ...                  |
| <b>1r</b><br>WAJKEZ                                                              | 1.670(2)  | 1.879(6)  | 1.013 | 1.805(2)  | 0.922 | 1.859(7) | 1.606(1)  | 3.429 | 1.4860   | 1.498    | 5.7 <sup>a</sup>  | ...                  |
| <b>1s</b><br>WAJKAV                                                              | 1.677(2)  | 1.849(4)  | 1.048 | 1.799(4)  | 0.927 | 1.847(6) | 1.602(2)  | 3.471 | 1.4818   | 1.52525  | 13.7 <sup>d</sup> | 7.9 <sup>d</sup>     |
| <b>1t</b><br>WAJKID                                                              | 1.680(3)  | 1.858(1)  | 1.048 | 1.805(4)  | 0.930 | 1.85(1)  | 1.607(3)  | 3.478 | 1.4850   | 1.858    | 15.7 <sup>c</sup> | 47.6 <sup>c, a</sup> |
| <b>1u</b><br>FUZRIE                                                              | 1.675(2)  | 1.864(8)  | 1.033 | 1.809(4)  | 0.942 | 1.842(5) | 1.608(2)  | 3.482 | 1.517    | 2.178    | 22.5              | 14.6                 |
| <b>1v</b><br>FUZROK                                                              | 1.696(4)  | 1.854(7)  | 1.076 | 1.815(3)  | 0.946 | 1.843(2) | 1.611(2)  | 3.536 | 1.519    | 2.1650   | 21.2              | ...                  |
| <b>1w</b><br>UFONOV                                                              | 1.6748(2) | 1.8755(9) | 1.022 | 1.810(1)  | 0.923 | 1.853(3) | 1.6023(9) | 3.448 | 1.094    | 1.4940   | ...               | ...                  |
| <b>1x</b><br>UFOPAJ                                                              | 1.686(4)  | 1.855(4)  | 1.059 | 1.809(2)  | 0.929 | 1.849(4) | 1.604(2)  | 3.494 | 0.965    | 1.5260   | ...               | 28.4 <sup>a</sup>    |
| <b>1y</b><br>UFOPEN                                                              | 1.698(3)  | 1.846(2)  | 1.086 | 1.806(4)  | 0.932 | 1.845(5) | 1.603(1)  | 3.523 | 0.947    | 1.5030   | ...               | 30.9                 |

<sup>a</sup> Average of two values.  
<sup>b</sup> Two independent molecule. Average of four values  
<sup>c</sup> Difference of two values.  
<sup>d</sup> Average of 8 values for 4 independent molecules.

**Table S5.** DFT-derived structural parameters (Figures S1 and S2) describing the geometry of the {*closo*-1-CB<sub>9</sub>} cluster.

| DFT parameters       |           |           |       |           |       |           |           |        |          |          |                   |                  |
|----------------------|-----------|-----------|-------|-----------|-------|-----------|-----------|--------|----------|----------|-------------------|------------------|
|                      | $d_{1B}$  | $d_{2B}$  | $h_B$ | $s$       | $h_C$ | $d_{2C}$  | $d_{1C}$  | $l$    | $d_{CX}$ | $d_{BY}$ | $\Theta_X$        | $\Theta_Y$       |
| <b>1a</b><br>LATRUW  | 1.6964(0) | 1.8380(0) | 1.090 | 1.8032(0) | 0.932 | 1.8393(0) | 1.5998(0) | 3.5257 | 1.0767   | 1.1885   | --                | --               |
| <b>1b</b><br>RUHZEZ  | 1.6963(0) | 1.843(1)  | 1.086 | 1.795(3)  | 0.938 | 1.848(4)  | 1.608(3)  | 3.5155 | 1.5078   | 1.1845   | 0.0               | --               |
| <b>1c</b><br>NEPKOI  | 1.6967(5) | 1.838(0)  | 1.090 | 1.8003(8) | 0.954 | 1.835(3)  | 1.6108(0) | 3.5455 | 1.4855   | 1.1879   | 0.0               | --               |
| <b>1d</b><br>WECVAD  | 1.6967(6) | 1.838(0)  | 1.090 | 1.8002(9) | 0.953 | 1.836(3)  | 1.6106(0) | 3.5447 | 1.4851   | 1.1877   | 0.0               | --               |
| <b>1e</b><br>JATMIB  | 1.6968(4) | 1.8386(0) | 1.090 | 1.8000(8) | 0.953 | 1.8364(4) | 1.6107(0) | 3.5436 | 1.4835   | 1.1876   | 0.0               | --               |
| <b>1f</b><br>JAHNUC  | 1.697(2)  | 1.8404(6) | 1.089 | 1.7987(7) | 0.941 | 1.85(1)   | 1.6088(0) | 3.5269 | 1.4789   | 1.1872   | 0.0               | --               |
| <b>1g</b><br>DEKNUG  | 1.6970(2) | 1.8392(0) | 1.090 | 1.7994(8) | 0.952 | 1.838(5)  | 1.6110(0) | 3.5413 | 1.4799   | 1.1873   | 0.0               | --               |
| <b>1h</b><br>JAHPEO  | 1.697(2)  | 1.8404(6) | 1.089 | 1.7987(7) | 0.941 | 1.85(1)   | 1.6088(0) | 3.5269 | 1.4789   | 1.1872   | 0.0               | --               |
| <b>1i</b><br>AKABOD  | 1.699(2)  | 1.8420(0) | 1.091 | 1.796(1)  | 0.950 | 1.845(1)  | 1.6140(0) | 3.5343 | 1.4615   | 1.1854   | 0.0               | --               |
| <b>1j</b><br>GIJUMUK | 1.697(1)  | 1.839(1)  | 1.090 | 1.800(3)  | 0.945 | 1.840(6)  | 1.608(2)  | 3.5346 | 1.5002   | 1.1876   | 12.1 <sup>a</sup> | --               |
| <b>1k</b><br>JAHPOY  | 1.696(1)  | 1.8383(9) | 1.090 | 1.802(2)  | 0.946 | 1.835(6)  | 1.606(3)  | 3.5386 | 1.505    | 1.1885   | 0.0               | --               |
| <b>1l</b>            | 1.6957(0) | 1.8414(0) | 1.086 | 1.8007(0) | 0.923 | 1.8487(0) | 1.600(0)  | 3.5076 | 1.7572   | 1.1869   | --                | --               |
| <b>1m</b>            | 1.697(2)  | 1.8404(6) | 1.089 | 1.800(1)  | 0.940 | 1.84(1)   | 1.607(1)  | 3.5274 | 1.4273   | 1.1877   | 0.0               | --               |
| <b>1n</b>            | 1.6977    | 1.844(3)  | 1.087 | 1.796(2)  | 0.930 | 1.856(5)  | 1.609(4)  | 3.5075 | 1.7688   | 1.1843   | 0.0 <sup>b</sup>  | --               |
| <b>1o</b>            | 1.699(2)  | 1.843(3)  | 1.090 | 1.795(2)  | 0.947 | 1.8468(7) | 1.613(5)  | 3.5290 | 1.4623   | 1.1846   | 0.0               | --               |
| <b>1p</b><br>AWIMEY  | 1.6863(6) | 1.8476(0) | 1.066 | 1.8006(8) | 0.950 | 1.838(3)  | 1.6099(0) | 3.5158 | 1.4862   | 2.1932   | 0.0               | --               |
| <b>1q</b>            | 1.6992(0) | 1.8579(0) | 1.078 | 1.7880(0) | 0.921 | 1.8876(0) | 1.6217(0) | 3.4716 | 1.3519   | 2.1562   | --                | --               |
| <b>1r</b><br>WAJKEZ  | 1.675(1)  | 1.8761(3) | 1.022 | 1.8002(5) | 0.924 | 1.857(8)  | 1.6053(2) | 3.4362 | 1.4913   | 1.471    | 0.0               | --               |
| <b>1s</b><br>WAJKAV  | 1.681(1)  | 1.853(2)  | 1.052 | 1.799(1)  | 0.931 | 1.851(9)  | 1.6060(6) | 3.4765 | 1.485    | 1.5264   | 1.2 <sup>a</sup>  | 0.0              |
| <b>1t</b><br>WAJKID  | 1.6794(3) | 1.856(2)  | 1.048 | 1.800(5)  | 0.930 | 1.85(1)   | 1.606(3)  | 3.4718 | 1.4866   | 1.8721   | 0.0               | 0.0 <sup>b</sup> |
| <b>1u</b><br>FUZRIE  | 1.670(2)  | 1.862(6)  | 1.026 | 1.803(3)  | 0.943 | 1.839(3)  | 1.606(3)  | 3.4690 | 1.5178   | 2.2121   | 10.3              | 12.1             |
| <b>1v</b><br>FUZROK  | 1.6856(8) | 1.847(2)  | 1.066 | 1.802(2)  | 0.949 | 1.834(1)  | 1.607(1)  | 3.5166 | 1.5166   | 2.1955   | 10.7              | --               |
| <b>1w</b><br>UFONOV  | 1.6753(0) | 1.8740(0) | 1.025 | 1.803(0)  | 0.915 | 1.8520(0) | 1.5978(0) | 3.4351 | 1.0763   | 1.4686   | --                | --               |
| <b>1x</b><br>UFOPAJ  | 1.6804(0) | 1.851(2)  | 1.054 | 1.802(6)  | 0.923 | 1.8455(0) | 1.592(6)  | 3.4750 | 1.0761   | 1.5277   | --                | 0.0              |
| <b>1y</b><br>UFOPEN  | 1.690(6)  | 1.8460(9) | 1.073 | 1.801(5)  | 0.924 | 1.844(7)  | 1.5984(6) | 3.4964 | 1.0761   | 1.5058   | --                | 9.4              |

<sup>a</sup> Average of two values.  
<sup>b</sup> Difference of two values.

## 5. Additional correlations of experimental and DFT structural parameters

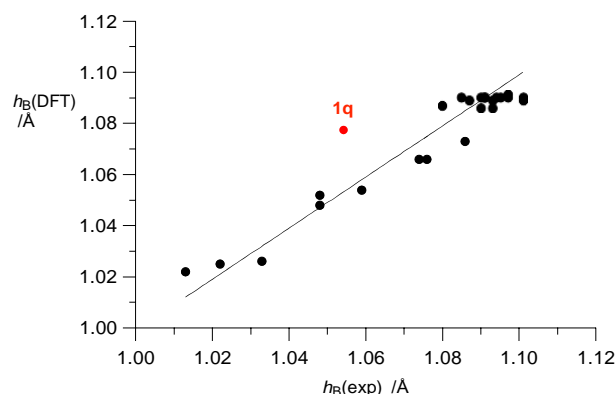

**Figure S3.** Correlation of experimental and DFT-derived geometrical parameter  $h_B$  for the {*closo*-1-CB<sub>9</sub>} cluster in series **1** as defined in Figure S1. Best fitting line excluding datapoint for **1q** (red):  $h_{B(\text{DFT})} = h_{B(\text{exp})} - 0.001(1)$ ,  $r^2 = 0.925$ . With **1q**  $r^2 = 0.883$ .

The experimental value  $h_{B(\text{exp})}$  for **1q** exhibits the largest difference from the predicted based on the general correlation of 0.023 Å, while the average absolute difference for this set of parameter is 0.005 Å. The second largest deviation from the prediction is for **1y** (0.012 Å).

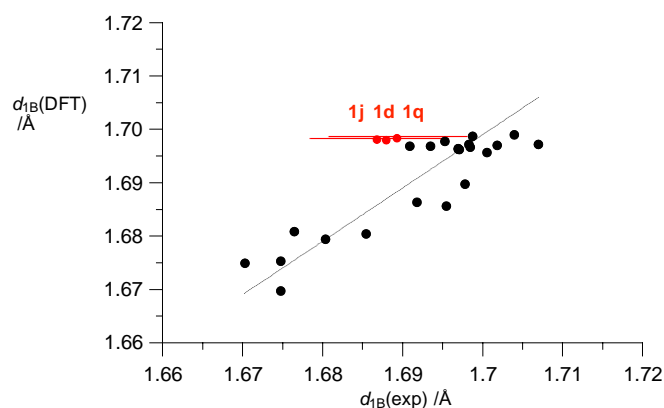

**Figure S4.** Correlation of experimental and DFT-derived geometrical parameter  $d_{1B}$  for the {*closo*-1-CB<sub>9</sub>} cluster in series **1** as defined in Figure S1. Best fitting line excluding datapoints for **1d**, **1j**, and **1q**:  $d_{1B(\text{DFT})} = d_{1B(\text{exp})} - 0.001(1)$ ,  $r^2 = 0.76$ . The horizontal red lines represent error bars with  $1\sigma$ .

The average absolute difference for this set of parameter is 0.0035 Å. Value  $d_{1B(\text{exp})}$  for the three derivatives **1d**, **1j**, and **1q** differ from the predicted by about 0.01 Å, which is comparable with the *std* for the last two average parameters. The *std* value for **1d** is 0.07 Å, which is covers a wide range of  $d_{1B(\text{exp})}$  values, from 1.61–1.75 Å.

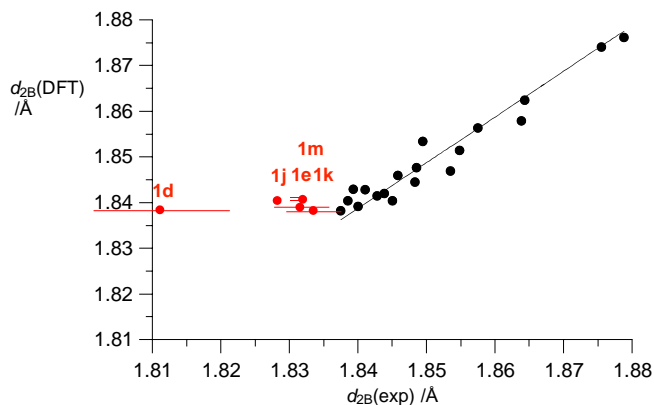

**Figure S5.** Correlation of experimental and DFT-derived geometrical parameter  $d_{2B}$  for the {*closo*-1- $\text{CB}_9$ } cluster in series **1** as defined in Figure S1. Best fitting line excluding datapoints for **1d**, **1e**, **1j**, **1k** and **1m** (red):  $d_{2B(\text{DFT})} = d_{2B(\text{exp})} - 0.001(1)$ ,  $r^2 = 0.76$ . The horizontal red lines represent error bars with  $1\sigma$ .

The experimental value  $d_{2B(\text{exp})}$  for **1d** exhibits the largest difference from the predicted based on the general correlation of  $0.027 \text{ \AA}$ , while the average absolute difference for this set of parameter is  $0.0025 \text{ \AA}$ . Also the  $d_{2B(\text{exp})}$  value for **1j** significantly deviate from the predicted by  $0.013 \text{ \AA}$ , which is close to the *std* value for this parameter ( $0.01 \text{ \AA}$ ). Three derivatives **1e**, **1m**, and **1k** deviate much less from the expected values ( $0.005$ – $0.009 \text{ \AA}$ ) and could be included in the correlation. Their *std* is  $0.002$  and  $0.004 \text{ \AA}$ .

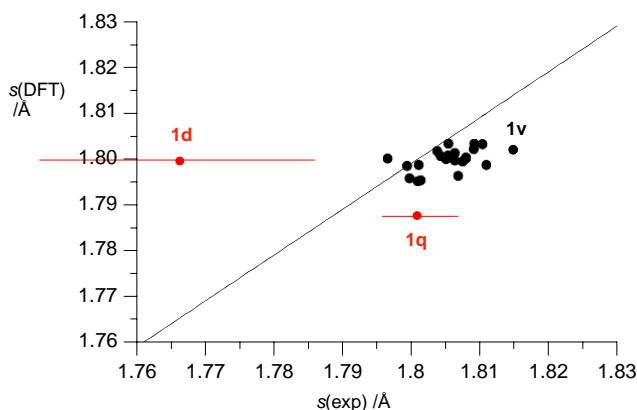

**Figure S6.** Correlation of experimental and DFT-derived geometrical parameter  $s$  for the {*closo*-1- $\text{CB}_9$ } cluster in series **1** as defined in Figure S1. Best fitting line excluding datapoints for **1d** and **1q**:  $s_{(\text{DFT})} = s_{(\text{exp})} - 0.001(1)$ ,  $r^2 = 0.999$ . The horizontal red lines represent error bars with  $1\sigma$ .

The experimental value  $s_{(\text{exp})}$  for **1d** exhibits the largest difference of  $0.032 \text{ \AA}$  from the predicted based on the general correlation, while the average absolute difference for this set of parameter is  $0.005 \text{ \AA}$ . Derivative **1q** deviate from the expected value by  $0.0145 \text{ \AA}$  with the *std* of  $0.006 \text{ \AA}$ . The remaining datapoints cluster close to the fitting line.

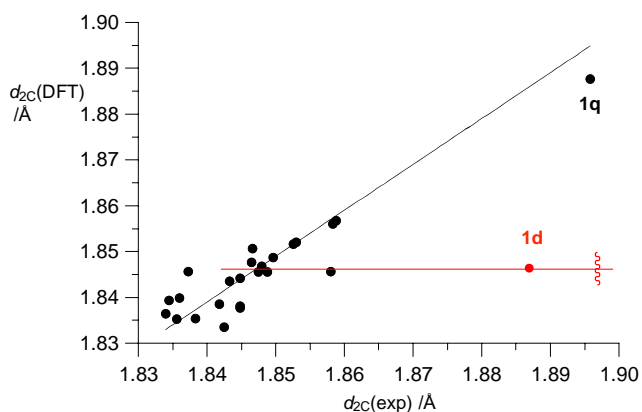

**Figure S7.** Correlation of experimental and DFT-derived geometrical parameter  $d_{2C}$  for the  $\{closo-1-CB_9\}$  cluster in series **1** as defined in Figure S1. Best fitting line excluding datapoint for **1d** (red):  $d_{2C(DFT)} = d_{2C(exp)} - 0.001(1)$ ,  $r^2 = 0.81$ . The horizontal red line represents the error bar with  $1\sigma$ .

Only the experimental value  $d_{2C}$  for **1d** does not conform to the general fitting line with the difference of  $0.045 \text{ \AA}$ , while the average absolute difference for this set of parameter is  $0.003 \text{ \AA}$ .

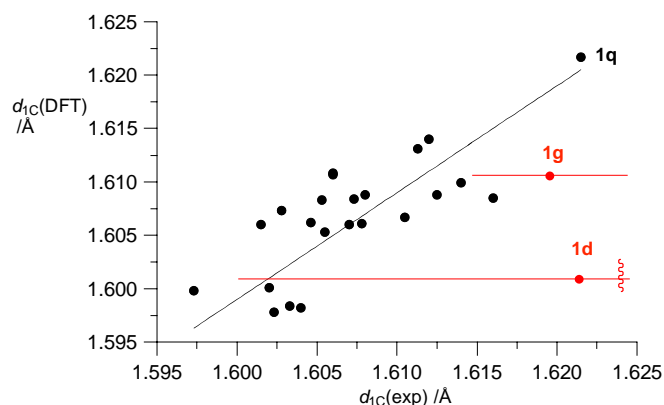

**Figure S8.** Correlation of experimental and DFT-derived geometrical parameter  $d_{1C}$  for the  $\{closo-1-CB_9\}$  cluster in series **1** as defined in Figure S1. Best fitting line excluding datapoints for **1d**, **1g**, and **1r** (red):  $d_{1C(DFT)} = d_{1C(exp)} - 0.001(1)$ ,  $r^2 = 0.56$ . The horizontal red line represents the error bar with  $1\sigma$ .

The experimental value  $d_{1C}$  for **1d** exhibits a large difference ( $0.011 \text{ \AA}$ ) from the value predicted based on the general correlation, while the average absolute difference for this set of parameter is  $0.003 \text{ \AA}$ . Also the  $d_{1C}$  value for **1g** deviate from the predicted by  $0.009 \text{ \AA}$ .

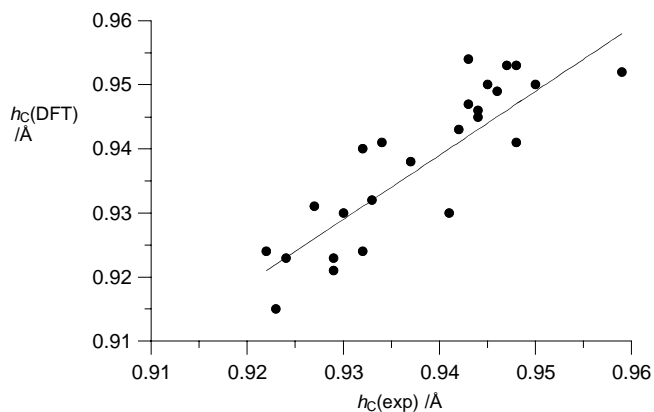

**Figure S9.** Correlation of experimental and DFT-derived geometrical parameter  $h_C$  for the {*closo*-1-CB<sub>9</sub>} cluster in series **1** as defined in Figure S1. Best fitting line:  $h_{C(\text{DFT})} = h_{C(\text{exp})} - 0.001(1)$ ,  $r^2 = 0.75$ .

No particular outliers in this correlation. The mean absolute difference between the experimental and DFT  $h_C$  values is 0.005 Å.

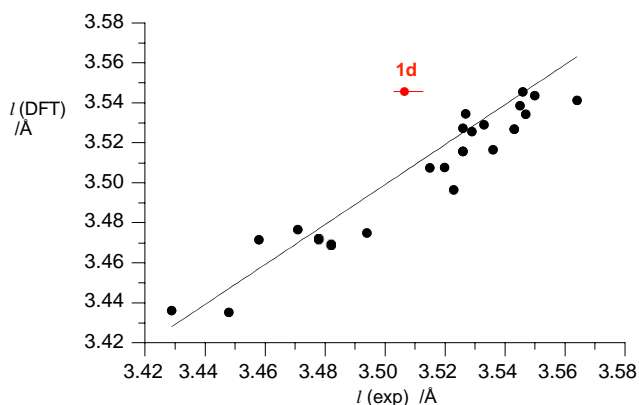

**Figure S10.** Correlation of experimental and DFT-derived geometrical parameter  $l$  for the {*closo*-1-CB<sub>9</sub>} cluster in series **1** (no **1d**) as defined in Figure S1. Fitting to the general correlation line  $l_{(\text{DFT})} = l_{(\text{exp})} - 0.001(1)$  without **1d**:  $r^2 = 0.86$ .

## 6. Hammett constants used in structural analysis

For the purpose of this work, Hammett parameters for 4-X-C<sub>6</sub>H<sub>4</sub> substituents were derived from correlation shown in Figure S11. All  $\sigma_p$  parameters used in this work are listed in Table S6.

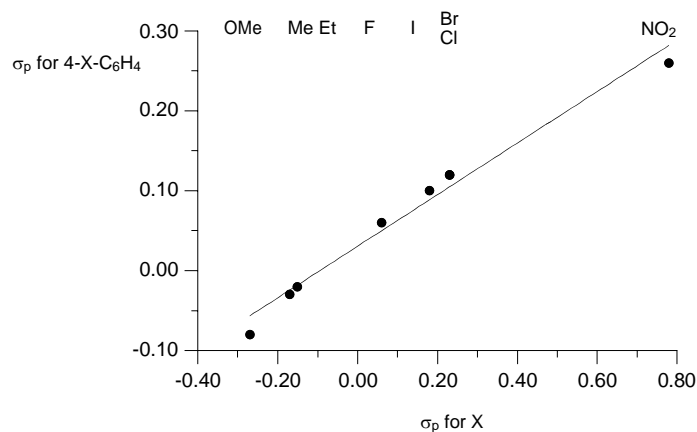

**Figure S11.** Correlation of Hammett parameter  $\sigma_p$  for substituents X and 4- $\text{XC}_6\text{H}_4$ -. Best fitting line:  $\sigma_{p(\text{XC}_6\text{H}_4)} = 0.323(20) \cdot \sigma_{p(X)} + 0.030(6)$ ,  $r^2 = 0.979$ .

**Table S6.** Hammett substituent constants used in the analysis;  $\sigma_X$  constant for substituent at the C(1) position,  $\sigma_Y$  constant for substituent at the B(10) position,  $\sigma_{X+Y}$  sum of the two Hammett constants.

| compound  | C-X                                                      | B-Y                                | $\sigma_X$         | $\sigma_Y$        | $\sigma_{X+Y}$ | ref <sup>a</sup> |
|-----------|----------------------------------------------------------|------------------------------------|--------------------|-------------------|----------------|------------------|
| <b>1a</b> | H                                                        | H                                  | 0.00               | 0.00              | 0.00           | definition       |
| <b>1b</b> | $\text{NMe}_3^+$                                         | H                                  | 0.82               | 0.00              | 0.82           | <sup>7</sup>     |
| <b>1c</b> | Ph                                                       | H                                  | -0.01              | 0.00              | -0.01          | <sup>7</sup>     |
| <b>1d</b> | $\text{C}_6\text{H}_4\text{F-4}$                         | H                                  | 0.06               | 0.00              | 0.06           | <sup>7</sup>     |
| <b>1e</b> | $\text{C}_6\text{H}_4\text{Br-4}$                        | H                                  | 0.12               | 0.00              | 0.12           | <sup>7</sup>     |
| <b>1f</b> | $\text{C}_6\text{H}_4\text{COOH-4}$                      | H                                  | 0.18               | 0.00              | 0.18           | this work        |
| <b>1g</b> | $\text{C}_6\text{H}_4\text{CN-4}$                        | H                                  | 0.24               | 0.00              | 0.24           | this work        |
| <b>1h</b> | COOH                                                     | H                                  | 0.45               | 0.00              | 0.45           | <sup>7</sup>     |
| <b>1i</b> | $\text{C}_6\text{H}_4\text{N}_2^+-4$                     | H                                  | 0.64               | 0.00              | 0.64           | this work        |
| <b>1j</b> | CONHPr- <i>i</i>                                         | H                                  | 0.36 <sup>b</sup>  | 0.00              | 0.36           |                  |
| <b>1k</b> | $\text{CH}_2\text{OH}$                                   | H                                  | 0.00               | 0.00              | 0.00           | <sup>7</sup>     |
| <b>1l</b> | Cl                                                       | H                                  | 0.23               | 0.00              | 0.23           | <sup>7</sup>     |
| <b>1m</b> | $\text{N=N-C}_6\text{H}_4\text{NH}_2-4$                  | H                                  | 0.31 <sup>c</sup>  | 0.00              | 0.31           |                  |
| <b>1n</b> | $\text{SMe}_2^+$                                         | H                                  | 0.90               | 0.00              | 0.90           | <sup>7</sup>     |
| <b>1o</b> | $2\text{-C}_5\text{H}_5\text{N}^+$                       | H                                  | —                  | 0.00              | —              |                  |
| <b>1p</b> | Ph                                                       | I                                  | -0.01              | 0.18              | 0.17           | <sup>7</sup>     |
| <b>1q</b> | $\text{N}_2^+$                                           | I                                  | 1.91               | 0.18              | 2.09           | <sup>7</sup>     |
| <b>1r</b> | COOH                                                     | $\text{N}_2^+$                     | 0.45               | 1.91              | 2.36           | <sup>7</sup>     |
| <b>1s</b> | COOH                                                     | $1\text{-C}_5\text{H}_5\text{N}^+$ | 0.45               | 0.82              | 1.27           | <sup>7-8</sup>   |
| <b>1t</b> | COOH                                                     | $1\text{-S(CH}_2)_5^+$             | 0.45               | 0.90 <sup>d</sup> | 1.35           | <sup>7</sup>     |
| <b>1u</b> | $\text{CH}_2\text{CH}_2\text{C}_6\text{H}_4\text{OMe-4}$ | $\text{PhI}^+$                     | -0.12 <sup>e</sup> | 1.50              | 1.38           | <sup>8</sup>     |
| <b>1v</b> | $\text{CH}_2\text{CH}_2\text{C}_6\text{H}_4\text{OMe-4}$ | I                                  | -0.12 <sup>e</sup> | 0.18              | 0.06           |                  |
| <b>1w</b> | H                                                        | $\text{N}_2^+$                     | 0.00               | 1.91              | 1.91           | <sup>7</sup>     |
| <b>1x</b> | H                                                        | $1\text{-C}_5\text{H}_5\text{N}^+$ | 0.00               | 0.82              | 0.82           | <sup>8</sup>     |
| <b>1y</b> | H                                                        | $\text{NHC(=NH}_2)\text{Me}^+$     | 0.00               | 0.48              | 0.48           | <sup>8</sup>     |

<sup>a</sup> Values for individual groups are taken from ref<sup>7</sup> unless indicated otherwise. <sup>b</sup> Value for COONHMe ref<sup>7</sup>. <sup>c</sup> Value for  $\text{N=N-C}_6\text{H}_3\text{-2-OH-5-Me}$ , ref<sup>7</sup>. <sup>d</sup> Value for  $\text{SMe}_2^+$ , ref<sup>7</sup>. <sup>e</sup> Value for  $\text{CH}_2\text{CH}_2\text{Ph}$ , ref<sup>7</sup>



## 7. Additional correlations of geometrical parameters with Hammett constants

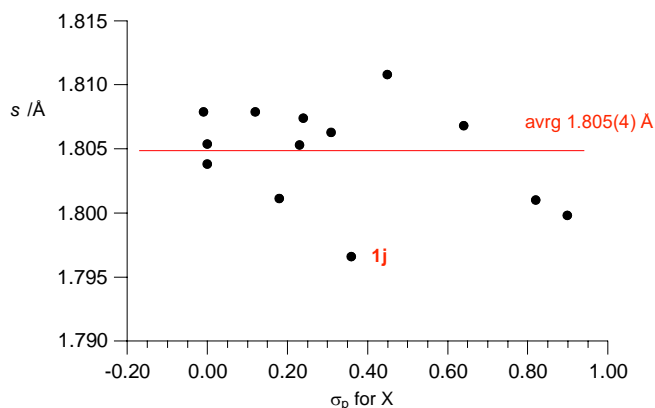

**Figure S12.** A plot of parameter  $s$  vs  $\sigma_p$  values for substituents at the C(1) in series **1a–1n** (no **1d**).

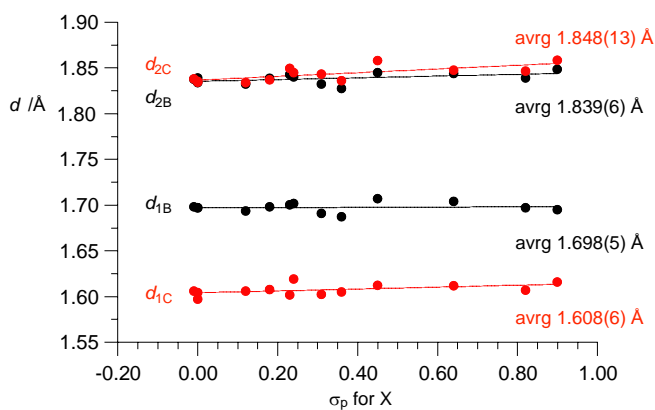

**Figure S13.** A plot of parameters  $d_C$  and  $d_B$  vs  $\sigma_p$  values for substituents at the C(1) in series **1a–1n** (no **1d**).

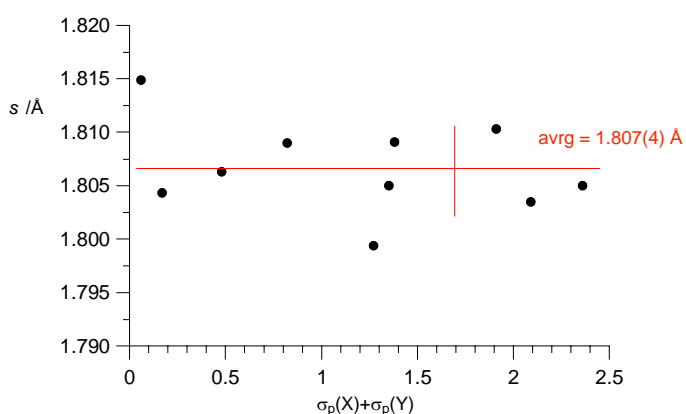

**Figure S14.** A plot of parameters  $s$  vs sum of  $\sigma_p(X)$  and  $\sigma_p(Y)$  values in series **1p–1y**. The horizontal red line represents the average value, while the vertical shows  $std$  for the average.

## 8. Archive for DFT results

### 1a

```
1\1\GINC-LOCALHOST\FOpt\RB3LYP\def2TZVP\C1H10B9(1-)\PIOTR\26-Sep-2021\
0\#\#P B3LYP/Def2TZVP FOpt(tight) geom(noangle, nodistance) fcheck #P S
CRF(Solvent=C6H5Cl)\1-CB10 parent anion, C4v\|-1,1\B,-1.3005599386,0.
,-0.5273135462\B,0.,1.3005599386,-0.5273135462\B,1.3005599386,0.,-0.52
73135462\B,0.,-1.3005599386,-0.5273135462\B,-0.9190159841,-0.919015984
1,0.9765035343\B,-0.9190159841,0.9190159841,0.9765035343\B,0.919015984
1,0.9190159841,0.9765035343\B,0.9190159841,-0.9190159841,0.9765035343\
B,0.,0.,2.0667252329\C,0.,0.,-1.4589830987\H,0.,0.,-2.5356835821\H,0.,
0.,3.2552369998\H,-2.3775177247,0.,-1.0286998375\H,0.,2.3775177247,-1.
0286998375\H,2.3775177247,0.,-1.0286998375\H,0.,-2.3775177247,-1.02869
98375\H,-1.7134978407,-1.7134978407,1.376958959\H,-1.7134978407,1.7134
978407,1.376958959\H,1.7134978407,1.7134978407,1.376958959\H,1.7134978
407,-1.7134978407,1.376958959\Version=ES64L-G09RevD.01\State=1-A1\HF=
-268.1440251\RMSD=8.716e-09\RMSF=3.300e-06\Dipole=0.,0.,-1.482228\Quad
rupole=-0.50885,-0.50885,1.0177,0.,0.,0.\PG=C04V [C4(H1B1C1H1),2SGV(H2
B2),2SGD(H2B2)]\@\
```

### 1b

```
1\1\GINC-LOCALHOST\FOpt\RB3LYP\def2TZVP\C4H18B9N1\PIOTR\27-May-2022\0\
\#\#P B3LYP/Def2TZVP FOpt(tight) geom(noangle, nodistance) fcheck #P SCR
F(Solvent=C6H5Cl) freq(noraman, readIso)\1-CB9 1-NMe3, Cs\0,1\B,1.43
47913117,-0.195869646,0.\B,-0.8193905121,1.1256583337,0.\B,1.608867181
4,2.6909900921,0.\C,-0.1713350871,-0.3405685896,0.\N,-0.9808310326,-1.
6126823227,0.\C,-0.0914857158,-2.825940503,0.\B,0.3135940799,0.4636672
108,1.3064026777\B,0.3135940799,0.4636672108,-1.3064026777\B,1.8552442
679,1.287527442,-0.9219232092\B,1.8552442679,1.287527442,0.9219232092\
B,0.2653819195,2.2203618537,0.920646695\B,0.2653819195,2.2203618537,-0
.920646695\C,-1.8689010778,-1.6820965371,1.2166857839\C,-1.8689010778,
-1.6820965371,-1.2166857839\H,2.2123961074,3.7101735576,0.\H,2.1117873
581,-1.1643493268,0.\H,-2.0002310503,1.2271282085,0.\H,-0.7277295679,-
3.7070322147,0.\H,0.0693905844,0.0368708364,2.3816369906\H,0.069390584
4,0.0368708364,-2.3816369906\H,2.7403110934,1.2319078453,1.713968789\H
,2.7403110934,1.2319078453,-1.713968789\H,-0.2179292425,2.9626548688,1
.7137961736\H,-0.2179292425,2.9626548688,-1.7137961736\H,-2.4709151121
,-2.5830570268,-1.1395868265\H,-2.4709151121,-2.5830570268,1.139586826
5\H,-1.2492737423,-1.7166251649,-2.1046039715\H,-1.2492737423,-1.71662
51649,2.1046039715\H,-2.5042666923,-0.8027540721,1.2353220715\H,-2.504
2666923,-0.8027540721,-1.2353220715\H,0.5293446306,-2.8078565493,-0.88
93145144\H,0.5293446306,-2.8078565493,0.8893145144\Version=ES64L-G09R
evD.01\State=1-A'\HF=-441.9219439\RMSD=3.233e-09\RMSF=5.616e-06\Dipole
=-3.3462859,-5.5037575,0.\Quadrupole=-0.2019437,1.1590397,-0.9570959,1
.2625091,0.,0.\PG=CS [SG(C2H4B3N1),X(C2H14B6)]\@\
```

### 1c

```
1\1\GINC-LOCALHOST\FOpt\RB3LYP\def2TZVP\C7H14B9(1-)\PIOTR\27-May-2022\
0\#\#P B3LYP/Def2TZVP FOpt(tight) geom(noangle, nodistance) fcheck #P S
CRF(Solvent=C6H5Cl) freq(noraman, readIso)\1-CB9 1-Ph, C2v\|-1,1\B,-1
.3006458629,0.,-2.6362759245\B,1.3006458629,0.,-2.6362759245\B,0.,1.29
90129767,-2.6358385269\B,0.,-1.2990129767,-2.6358385269\B,-0.919304973
7,-0.9160778973,-1.1350814636\B,-0.9193049737,0.9160778973,-1.13508146
36\B,0.9193049737,0.9160778973,-1.1350814636\B,0.9193049737,-0.9160778
973,-1.1350814636\B,0.,0.,-3.7265157129\C,0.,0.,-0.1809550497\C,0.,0.,
1.304518391\C,-1.2003430572,0.,3.4137787992\C,1.2003430572,0.,3.413778
7992\C,-1.1990968349,0.,2.0236021895\C,1.1990968349,0.,2.0236021895\C,
0.,0.,4.1169620567\H,-2.4235093952,0.,-3.0373783427\H,2.4235093952,0.,
-3.0373783427\H,0.,2.4239272608,-3.030791255\H,0.,-2.4239272608,-3.030
791255\H,-1.6750972649,-1.6793661623,-0.6301635808\H,-1.6750972649,1.6
793661623,-0.6301635808\H,1.6750972649,1.6793661623,-0.6301635808\H,1.
6750972649,-1.6793661623,-0.6301635808\H,0.,0.,-4.9143752165\H,-2.1426
597635,0.,3.9482676006\H,2.1426597635,0.,3.9482676006\H,-2.1385032147,
```

0.,1.485774062\H,2.1385032147,0.,1.485774062\H,0.,0.,5.1998846052\\Version=ES64L-G09RevD.01\State=1-A1\HF=-499.2796487\RMSD=5.994e-09\RMSF=1.786e-06\Dipole=0.,0.,4.5887488\Quadrupole=9.7392198,4.0891248,-13.8283445,0.,0.,0.\PG=C02V [C2(H1B1C1C1C1H1),SGV(C4H6B2),SGV'(H2B2),X(H4B4)]\\@

### 1d

1\1\GINC-LOCALHOST\FOpt\RB3LYP\def2TZVP\C7H13B9F1(1-)\PIOTR\11-Jan-2023\0\\#P B3LYP/Def2TZVP FOpt(tight) geom(noangle, nodistance) fcheck #P SCRF(Solvent=C6H5Cl) freq(noraman, readIso)\1-CB9 1-Ph-4-F, C2v\\-1,1\B,0.,1.3007232361,-3.3503217201\B,0.,-1.3007232361,-3.3503217201\B,1.299122339,0.,-3.350429337\B,-1.299122339,0.,-3.350429337\B,-0.9164416501,0.9191755843,-1.8496105143\B,0.9164416501,0.9191755843,-1.8496105143\B,0.9164416501,-0.9191755843,-1.8496105143\B,-0.9164416501,-0.9191755843,-1.8496105143\B,0.,0.,-4.4407615182\C,0.,0.,-0.8960516692\C,0.,0.,0.5889671464\C,0.,1.2093418716,2.6985556371\C,0.,-1.2093418716,2.6985556371\C,0.,1.1986181321,1.3082695344\C,0.,-1.1986181321,1.3082695344\C,0.,0.,3.3674431009\H,0.,2.4235388766,-3.7512132944\H,0.,-2.4235388766,-3.7512132944\H,2.4239302405,0.,-3.7453233767\H,-2.4239302405,0.,-3.7453233767\H,-1.6791755669,1.674916523,-1.3436565011\H,1.6791755669,1.674916523,-1.3436565011\H,-1.6791755669,-1.674916523,-1.3436565011\H,0.,0.,-5.6285012338\H,0.,2.1369935399,3.2552868334\H,0.,-2.1369935399,3.2552868334\H,0.,2.1391398224,0.7734837597\H,0.,-2.1391398224,0.7734837597\F,0.,0.,4.7273125885\\Version=ES64L-G09RevD.01\State=1-A1\HF=-598.5623413\RMSD=5.553e-09\RMSF=2.300e-06\Dipole=0.,0.,4.5736269\Quadrupole=10.3198116,16.6280238,-26.9478354,0.,0.,0.\PG=C02V [C2(H1B1C1C1C1F1),SGV(C4H6B2),SGV'(H2B2),X(H4B4)]\\@

### 1e

1\1\GINC-LOCALHOST\FOpt\RB3LYP\def2TZVP\C1H9B9Br1(1-)\PIOTR\29-May-2022\0\\#P B3LYP/Def2TZVP FOpt(tight) geom(noangle, nodistance) fcheck #P SCRF(Solvent=C6H5Cl)\1-CB9-1-Br, C4v\\-1,1\B,-1.3073768887,0.,-0.0142463228\B,0.,1.3073768887,-0.0142463228\B,1.3073768887,0.,-0.0142463228\B,0.,-1.3073768887,-0.0142463228\B,-0.9207175138,-0.9207175138,1.4849322403\B,-0.9207175138,0.9207175138,1.4849322403\B,0.9207175138,0.9207175138,1.4849322403\B,0.9207175138,-0.9207175138,1.4849322403\B,0.,0.,2.5710008184\C,0.,0.,-0.9360266542\Br,0.,0.,-2.8547563276\H,0.,0.,3.7580013095\H,-2.3751892468,0.,-0.5283747221\H,0.,2.3751892468,-0.5283747221\H,2.3751892468,0.,-0.5283747221\H,0.,-2.3751892468,-0.5283747221\H,-1.7143103716,-1.7143103716,1.8842389053\H,-1.7143103716,1.7143103716,1.8842389053\H,1.7143103716,1.7143103716,1.8842389053\H,1.7143103716,-1.7143103716,1.8842389053\\Version=ES64L-G09RevD.01\State=1-A1\HF=-2841.7199886\RMSD=5.474e-09\RMSF=1.192e-06\Dipole=0.,0.,-2.7574096\Quadrupole=4.642377,4.642377,-9.284754,0.,0.,0.\PG=C04V [C4(H1B1C1Br1),2SGV(H2B2),2SGD(H2B2)]\\@

### 1f

1\1\GINC-LOCALHOST\FOpt\RB3LYP\def2TZVP\C8H14B9O2(1-)\PIOTR\28-May-2022\0\\#P B3LYP/Def2TZVP FOpt(tight) geom(noangle, nodistance) fcheck #P SCRF(Solvent=C6H5Cl) freq(noraman, readIso)\1-CB9 1-Ph-4-COOH, Cs\\-1,1\B,3.7363432361,1.2869798797,0.\B,3.7275983256,-1.3152831946,0.\B,3.7288993417,-0.0135829901,1.2995898288\B,3.7288993417,-0.0135829901,-1.2995898288\B,2.2337399187,0.912962703,-0.9156851653\B,2.2337399187,0.912962703,-0.9156851653\B,2.2277574015,-0.9299670253,0.9158146285\B,2.2277574015,-0.9299670253,-0.9158146285\B,4.8204080665,-0.0172441984,0.\C,1.2779104553,-0.0052510858,0.\C,-0.2029167911,0.0071878515,0.\C,-2.2934549901,1.2329215381,0.\C,-2.3204437365,-1.1750533229,0.\C,-0.9098540225,1.21605134,0.\C,-0.9348877638,-1.1853575979,0.\C,-3.0167629196,0.0371264551,0.\H,4.1421935927,2.4076996969,0.\H,4.1261996929,-2.4387007156,0.\H,4.1239949933,-0.0153931293,2.4240632084\H,4.1239949933,-0.0153931293,-2.4240632084\H,1.7297925822,1.6696679886,-1.6780416079\H,1.7297925822,1.6696679886,1.6780416079\H,1.7197193269,-1.6840635495,1.6784

664134\H,1.7197193269,-1.6840635495,-1.6784664134\H,6.0080770977,-0.02  
05652225,0.\H,-2.82980423,2.1721599979,0.\H,-2.8648790335,-2.108692363  
3,0.\H,-0.3630776803,2.1494967766,0.\H,-0.4080419585,-2.1302394049,0.\  
C,-4.4936730786,0.1013143524,0.\O,-5.1478959639,1.1227629862,0.\O,-5.0  
851565568,-1.1155814894,0.\H,-6.0438123679,-0.9674653979,0.\Version=E  
S64L-G09RevD.01\State=1-A'\HF=-687.9435752\RMSD=7.015e-09\RMSF=5.926e-  
06\Dipole=-5.5599033,-0.6716147,0.\Quadrupole=-32.9440511,17.7347391,1  
5.2093119,8.7021167,0.,0.\PG=CS [SG(C8H8B3O2),X(H6B6)]\

### 1g

1\1\GINC-LOCALHOST\FOpt\RB3LYP\def2TZVP\C8H13B9N1(1-)\PIOTR\11-Jan-202  
3\0\#\#P B3LYP/Def2TZVP FOpt(tight) geom(noangle, nodistance) fcheck #P  
SCR(F(Solvent=C6H5Cl) freq(noraman, readIso)\1-CB9 1-Ph-4-CN, C2v\1\B  
,1\B,0.,1.3012244687,-3.3403973204\B,0.,-1.3012244687,-3.3403973204\B,  
1.29973796,0.,-3.3380605607\B,-1.29973796,0.,-3.3380605607\B,-0.916341  
1349,0.9216769732,-1.8400048259\B,0.9163411349,0.9216769732,-1.8400048  
259\B,0.9163411349,-0.9216769732,-1.8400048259\B,-0.9163411349,-0.9216  
769732,-1.8400048259\B,0.,0.,-4.429466771\C,0.,0.,-0.8881511086\C,0.,0  
,0.5917901407\C,0.,1.2096490421,2.6941343701\C,0.,-1.2096490421,2.694  
1343701\C,0.,1.2014183372,1.3101738754\C,0.,-1.2014183372,1.3101738754  
\C,0.,0.,3.3989896112\H,0.,2.4232602869,-3.7420336158\H,0.,-2.42326028  
69,-3.7420336158\H,2.4239389506,0.,-3.7332218959\H,-2.4239389506,0.,-3  
.7332218959\H,-1.6782349698,1.6763385313,-1.3320428253\H,1.6782349698,  
1.6763385313,-1.3320428253\H,1.6782349698,-1.6763385313,-1.3320428253\  
H,-1.6782349698,-1.6763385313,-1.3320428253\H,0.,0.,-5.6167372246\H,0.  
,2.1470796301,3.2339093503\H,0.,-2.1470796301,3.2339093503\H,0.,2.1402  
971849,0.7732744803\H,0.,-2.1402971849,0.7732744803\C,0.,0.,4.82604370  
28\N,0.,0.,5.9802191611\Version=ES64L-G09RevD.01\State=1-A1\HF=-591.5  
643711\RMSD=7.488e-09\RMSF=2.001e-06\Dipole=0.,0.,3.1833517\Quadrupole  
=20.7022706,27.5544588,-48.2567294,0.,0.,0.\PG=C02V [C2(H1B1C1C1C1N1

### 1h

1\1\GINC-LOCALHOST\FOpt\RB3LYP\def2TZVP\C2H10B9O2(1-)\PIOTR\27-May-202  
2\0\#\#P B3LYP/Def2TZVP FOpt(tight) geom(noangle, nodistance) fcheck #P  
SCR(F(Solvent=C6H5Cl) freq(noraman, readIso)\1-CB9H9-1-COOH, Cs\1\B  
,1.7042900366,-0.234233542,0.\B,-0.5052746981,-1.6136418695,0.\B,0.596  
2011416,-0.9170756676,1.3002958825\B,0.5962011416,-0.9170756676,-1.300

### 1i

1\1\GINC-LOCALHOST\FOpt\RB3LYP\def2TZVP\C7H13B9N2\PIOTR\27-May-2022\0\  
\#P B3LYP/Def2TZVP FOpt(tight) geom(noangle, nodistance) fcheck #P SCR  
F(Solvent=C6H5Cl) freq(noraman, readIso)\1-CB9 1-Ph-4-N2, C2v\0,1\B,  
0.,1.303141187,-3.3204242293\B,0.,-1.303141187,-3.3204242293\B,1.30183  
35863,0.,-3.3117247453\B,-1.3018335863,0.,-3.3117247453\B,-0.915530173  
3,0.9299036076,-1.822384455\B,0.9155301733,0.9299036076,-1.822384455\B  
,0.9155301733,-0.9299036076,-1.822384455\B,-0.9155301733,-0.9299036076  
,-1.822384455\B,0.,0.,-4.4070013139\C,0.,0.,-0.872688019\C,0.,0.,0.588  
7761624\C,0.,1.2354304533,2.6769896239\C,0.,-1.2354304533,2.6769896239

\C,0.,1.2144515726,1.3042869255\C,0.,-1.2144515726,1.3042869255\C,0.,0  
. ,3.3485254415\H,0.,2.4223575171,-3.7247560253\H,0.,-2.4223575171,-3.7  
247560253\H,2.4240004905,0.,-3.7072071774\H,-2.4240004905,0.,-3.707207  
1774\H,-1.6753627843,1.6805954942,-1.3075956756\H,1.6753627843,1.68059  
54942,-1.3075956756\H,1.6753627843,-1.6805954942,-1.3075956756\H,-1.67  
53627843,-1.6805954942,-1.3075956756\H,0.,0.,-5.5923094987\H,0.,2.1619  
709752,3.2327781968\H,0.,-2.1619709752,3.2327781968\H,0.,2.1479007597,  
0.7604061947\H,0.,-2.1479007597,0.7604061947\N,0.,0.,4.7097816315\N,0.  
,0.,5.8141928821\\Version=ES64L-G09RevD.01\State=1-A1\HF=-608.0009631\  
RMSD=5.349e-09\RMSF=1.626e-06\Dipole=0.,0.,9.9479919\Quadrupole=-6.720  
5934,2.5710609,4.1495325,0.,0.,0.\PG=C02V [C2(H1B1C1C1C1N1N1),SGV(C4H6  
B2),SGV'(H2B2),X(H4B4)]\\@

### 1j

1\1\GINC-LOCALHOST\FOpt\RB3LYP\def2TZVP\C5H17B9N1O1(1-)\PIOTR\30-May-2  
022\0\\#P B3LYP/Def2TZVP FOpt(tight) geom(noangle, nodistance) fcheck  
#P SCRF(Solvent=C6H5Cl)\CB9H9-1-CONH-i-Pr, C1\\-1,1\B,-2.3208578717,1  
.0873196761,0.2717462237\B,-1.9391984528,-1.4291959263,-0.2722905014\B  
, -2.1649651589,0.1005371608,-1.2709192916\B,-2.0890941414,-0.440303981  
1,1.2711490283\B,-0.7532397743,0.7601645959,1.0946297368\B,-0.80802752  
44,1.1393402288,-0.7009482834\B,-0.5372686608,-0.6443488005,-1.0870499  
652\B,-0.4872430565,-1.0244523635,0.7049290436\B,-3.2057625845,-0.3338  
07052,-0.0021392306\H,-4.3799929256,-0.51162435,-0.005235823\C,0.28807  
73991,0.2012958713,0.0067711155\C,1.7653320953,0.4627281626,0.01196735  
84\O,2.2287120742,1.6000786005,0.0130484317\H,-2.885522113,2.110269826  
7,0.5057113252\H,-2.171085649,-2.5746655255,-0.5071265036\H,-2.5910781  
723,0.2743113694,-2.3702546055\H,-2.4475734834,-0.7343966857,2.3690728  
634\H,-0.3418322709,1.4054347798,2.0001528909\H,-0.4462665332,2.101876  
8907,-1.2886088404\H,0.055245213,-1.1440449107,-1.9860266179\H,0.14342  
11175,-1.8413888647,1.2928356992\N,2.5392084456,-0.6486210328,0.012699  
1412\C,3.9988679523,-0.6410388938,0.0208352683\H,2.0707458222,-1.54087  
92201,0.0356096316\H,4.2800369672,0.4114872559,0.0312047299\C,4.532334  
664,-1.3138496608,1.2868365424\H,4.2284562214,-2.3634248712,1.32842665  
44\H,5.6233073207,-1.2799396761,1.3064876172\H,4.1562426275,-0.8140371  
548,2.1803914648\C,4.5483148591,-1.2922787105,-1.2497193775\H,4.181241  
7458,-0.7785299116,-2.139073304\H,5.6394149611,-1.2553010777,-1.256449  
7846\H,4.2472885467,-2.3416046194,-1.3120133178\\Version=ES64L-G09RevD  
.01\State=1-A\HF=-554.907793\RMSD=6.566e-09\RMSF=2.332e-06\Dipole=4.85  
84174,-1.8459175,0.0356534\Quadrupole=-12.8718548,4.1925266,8.6793282,  
-5.2609229,-0.0248993,-0.0655855\PG=C01 [X(C5H17B9N1O1)]\\@

### 1k

1\1\GINC-LOCALHOST\FOpt\RB3LYP\def2TZVP\C2H12B9O1(1-)\PIOTR\27-May-202  
2\0\\#P B3LYP/Def2TZVP FOpt(tight) geom(noangle, nodistance) fcheck #P  
SCRF(Solvent=C6H5Cl) freq(noraman, readIso)\CB9H9-CH2OH, Cs, eclipsed  
orient\\-1,1\B,-1.6656615014,0.7934647827,-0.9204600782\B,-1.387059 57,-  
1.0203183185,0.9213611436\B,-1.38705957,-1.0203183185,-0.921361143  
6\B,-1.6656615014,0.7934647827,0.9204600782\B,-0.2347128122,1.39061271  
65,0.\B,-0.0441648229,0.1081799354,-1.2985047041\B,0.1606384058,-1.172  
2741864,0.\B,-0.0441648229,0.1081799354,1.2985047041\B,-2.6037630364,-  
0.2774331973,0.\H,-3.7779119768,-0.4615371222,0.\C,0.8942627122,0.2549  
427319,0.\H,-2.1786316795,1.5210707991,-1.7142858121\H,-1.6636773124,-  
1.8680843196,-1.7132986332\H,-1.6636773124,-1.8680843196,1.7132986332\  
H,-2.1786316795,1.5210707991,1.7142858121\H,0.105913849,2.5296586939,0  
\H,0.4627776869,0.1923926111,-2.3700347298\H,0.8038918597,-2.16674074  
67,0.\H,0.4627776869,0.1923926111,2.3700347298\C,2.3657821173,0.571076  
5917,0.\H,2.6048739517,1.1704268081,-0.8849926339\H,2.6048739517,1.170  
4268081,0.8849926339\O,3.1453182572,-0.6289858148,0.\H,4.0747703235,-0  
.3739931617,0.\\Version=ES64L-G09RevD.01\State=1-A'\HF=-382.7180745\RM  
SD=3.709e-09\RMSF=7.916e-06\Dipole=3.1681943,0.8521271,0.\Quadrupole=0  
.2793851,-0.4692656,0.1898805,3.2905549,0.,0.\PG=CS [SG(C2H4B3O1),X(H8  
B6)]\\@

11

```
1\1\GINC-LOCALHOST\FOpt\RB3LYP\def2TZVP\C1H9B9C11(1-)\PIOTR\26-May-202
2\0\#\#P B3LYP/Def2TZVP FOpt(tight) geom(noangle, nodistance) fcheck #P
SCRf(Solvent=C6H5Cl)\1-CB9-1-C1, C4v\1,1\B,-1.3072099253,0.,-0.010
760554\B,0.,1.3072099253,-0.010760554\B,1.3072099253,0.,-0.010760554\B
,0.,-1.3072099253,-0.010760554\B,-0.9207091648,-0.9207091648,1.4876995
094\B,-0.9207091648,0.9207091648,1.4876995094\B,0.9207091648,0.9207091
648,1.4876995094\B,0.9207091648,-0.9207091648,1.4876995094\B,0.,0.,2.5
740474046\C,0.,0.,-0.9335206481\C1,0.,0.,-2.6907407277\H,0.,0.,3.76097
12348\H,-2.3722293893,0.,-0.5309633801\H,0.,2.3722293893,-0.5309633801
\H,2.3722293893,0.,-0.5309633801\H,0.,-2.3722293893,-0.5309633801\H,-1
.7142127945,-1.7142127945,1.8874399971\H,-1.7142127945,1.7142127945,1.
8874399971\H,1.7142127945,1.7142127945,1.8874399971\H,1.7142127945,-1.
7142127945,1.8874399971\Version=ES64L-G09RevD.01\State=1-A1\HF=-727.7
643858\RMSD=4.868e-09\RMSF=3.600e-06\Dipole=0.,0.,-1.7237142\Quadrupol
e=3.0999286,3.0999286,-6.1998571,0.,0.,0.\PG=C04V [C4(H1B1C1C11),2SGV(
H2B2),2SGD(H2B2)]\@
```

1m

```
1\1\GINC-LOCALHOST\FOpt\RB3LYP\def2TZVP\C7H15B9N3(1-)\PIOTR\29-May-202
2\0\#\#P B3LYP/Def2TZVP FOpt(tight) geom(noangle, nodistance) fcheck #P
SCRf(Solvent=C6H5Cl)\CB9H9-1-N=N-PhNH2, C1\1,1\B,-3.5664679723,2.4
477961811,-0.0098648597\B,-1.3469977773,3.8100045436,-0.0096060237\B,-
2.4562090481,3.129536739,1.2908008246\B,-2.4478739308,3.1164356988,-1.
3101971367\B,-2.4546175746,1.3596920775,-0.9160382893\B,-2.4605151604,
1.368922926,0.9140869128\B,-0.8811518397,2.3418622078,0.9160139358\B,-
0.8752816249,2.3325378504,-0.9176138269\B,-3.0266974536,4.0523196363,-
0.0161879552\H,-3.6458391649,5.0658669286,-0.0233008754\C,-1.175846672
2,1.0495534148,0.0047583744\H,-4.7330234929,2.2026263556,-0.0123592683
\H,-0.6060073676,4.7437530589,-0.0118661906\H,-2.6684326776,3.47385475
07,2.4120808882\H,-2.6529088713,3.449604698,-2.4361541618\H,-2.8233864
537,0.5209426481,-1.6697516214\H,-2.834044391,0.5376943278,1.673809534
1\H,0.0246763378,2.2962956361,1.6792193991\H,0.0352972217,2.279496752,
-1.674617045\N,-0.5121940885,-0.2140229479,0.0135125335\N,0.732044183,
-0.1510511467,0.0185278837\C,1.4173496261,-1.3865873514,0.0279032075\C
,0.8079312319,-2.6495127089,0.036639142\C,2.8122200886,-1.3152714015,0
.0315433257\C,1.574451423,-3.7957724944,0.0477093834\C,3.5871946589,-2
.4615471774,0.0429087136\C,2.9811653591,-3.7262174323,0.051618639\H,-0
.2710694507,-2.7155969827,0.0364632124\H,3.2797027826,-0.3385526554,0.
0273066924\H,1.0936706677,-4.7672603244,0.0529129368\H,4.668036133,-2.
386058098,0.0446981773\N,3.7394893376,-4.8791982855,0.0109812271\H,4.7
006507594,-4.8047470338,0.3033808034\H,3.2928022118,-5.7300063907,0.31
34904472\Version=ES64L-G09RevD.01\State=1-A\HF=-664.1574544\RMSD=5.58
8e-09\RMSF=5.763e-07\Dipole=5.2723187,-6.7943052,0.4382208\Quadrupole=
-0.0342983,-5.6932846,5.7275829,13.9293115,2.8739798,-3.8712597\PG=C01
[X(C7H15B9N3)]\@
```

1n

```
1\1\GINC-LOCALHOST\FOpt\RB3LYP\def2TZVP\C3H15B9S1\PIOTR\26-May-2022\0\
\#P B3LYP/Def2TZVP FOpt(tight) geom(noangle, nodistance) fcheck #P SCR
F(Solvent=C6H5Cl)\1-CB9-1-SMe2, Cs\0,1\B,-3.0893045107,-0.7062984167
,0.\B,-0.5467174734,-0.2761670466,1.3106404698\B,-0.5467174734,-0.2761
670466,-1.3106404698\B,-0.7718032001,1.0254522659,0.\B,-0.3285049547,-
1.5651605766,0.\B,-1.8620812874,-1.4338633374,0.9206351434\B,-2.173969
6864,0.3876237201,-0.920259767\B,-1.8620812874,-1.4338633374,-0.920635
1434\B,-2.1739696864,0.3876237201,0.920259767\C,0.3664818541,-0.106202
4591,0.\S,2.1220671109,0.1097205206,0.\C,2.444685491,1.2073341358,1.39
56007728\C,2.444685491,1.2073341358,-1.3956007728\H,1.8192002714,2.093
7177248,1.3298464278\H,2.2346134719,0.6450577684,2.300697936\H,2.23461
34719,0.6450577684,-2.300697936\H,1.8192002714,2.0937177248,-1.3298464
278\H,-0.0479063271,-0.1912701829,2.3805150748\H,-0.0479063271,-0.1912
701829,-2.3805150748\H,-0.4513861497,2.1668170617,0.\H,0.374703732,-2.
5175534617,0.\H,-2.1247566527,-2.2797228708,1.7132925408\H,3.501847093
```

7,1.4614346508,-1.3520797939\H,3.5018470937,1.4614346508,1.3520797939\  
H,-4.2566984994,-0.9057811899,0.\H,-2.7006402328,1.0995659601,-1.71317  
70989\H,-2.1247566527,-2.2797228708,-1.7132925408\H,-2.7006402328,1.09  
95659601,1.7131770989\\Version=ES64L-G09RevD.01\State=1-A'\HF=-745.445  
0929\RMSD=4.081e-09\RMSF=2.441e-06\Dipole=5.9345197,2.062557,0.\Quadru  
pole=1.4423738,-2.0995423,0.6571685,4.1906492,0.,0.\PG=CS [SG(C1H3B3S1  
) ,X(C2H12B6)]\@

### 1o

1\1\GINC-LOCALHOST\FOpt\RB3LYP\def2TZVP\C6H14B9N1\PIOTR\26-May-2022\0\  
\#P B3LYP/Def2TZVP FOpt(tight) geom(noangle, nodistance) fcheck #P SCR  
F(Solvent=C6H5Cl) freq(noraman, readIso)\1-CB9-2-Pyridine, Cl, re-sta  
rts at B3LYP/6-31G(d,p) geo\0,1\B,-0.9229401836,0.9402073203,2.589283  
0617\B,0.8802348884,-0.9405756265,2.647695329\B,-0.9644089001,-0.89971  
33544,2.588564253\B,0.9216706932,0.8978736813,2.6484118881\B,0.0595583  
53,1.3098978265,1.1281172132\B,-1.2683456617,0.0281488709,1.0861646185  
\B,0.0004653953,-1.3121544406,1.1270941471\B,1.3304287414,-0.030450666  
,1.1673583925\B,-0.0571100553,-0.0001711921,3.7075641031\C,0.060490030  
4,-0.0014459428,0.1806571052\C,0.0957574297,-0.0016691738,-1.281241548  
1\C,-1.2090854897,0.0285415439,-3.2817255484\C,1.1619567109,-0.0248702  
963,-3.4377344807\N,-1.0843119576,0.0252027416,-1.9411046154\C,1.25222  
3933,-0.0274471354,-2.0568541604\C,-0.0841845514,0.0034798759,-4.06654  
21257\H,-1.7117714193,1.7488686025,2.9608949095\H,1.6412267519,-1.7486  
842603,3.0743547038\H,-1.7888748681,-1.6723068278,2.9595606782\H,1.718  
2879647,1.6705454153,3.0756889672\H,0.0965567809,2.3741272529,0.609078  
1356\H,-2.332183518,0.052333922,0.5532565462\H,-0.0105110794,-2.376565  
5114,0.6072256398\H,2.4206260352,-0.0548401791,0.7049901302\H,-0.09585  
68736,0.0002398926,4.8916845449\H,-2.2157411532,0.0513956557,-3.670024  
6028\H,2.0651280545,-0.0450059882,-4.0327402378\H,-1.9230989485,0.0438  
923689,-1.3671875231\H,2.2090145311,-0.049219708,-1.5595404313\H,-0.17  
75684985,0.0060071874,-5.1417535775\\Version=ES64L-G09RevD.01\State=1-  
A'\HF=-515.7838317\RMSD=8.227e-09\RMSF=1.948e-06\Dipole=-0.6328919,0.01  
72653,-7.6560792\Quadrupole=4.2027127,-7.3324387,3.129726,-0.2612492,2  
.4995741,-0.0604688\PG=C01 [X(C6H14B9N1)]\@

### 1p

1\1\GINC-LOCALHOST\FOpt\RB3LYP\def2TZVP\C7H13B9I1(1-)\PIOTR\28-May-202  
2\0\\#P B3LYP/Def2TZVP FOpt(tight) geom(noangle, nodistance) fcheck #P  
SCRF(Solvent=C6H5Cl)\1-CB9 1-Ph-10-I, C2v\1,1\B,0.,1.3072962429,-0  
.6039325781\B,0.,-1.3072962429,-0.6039325781\B,1.3056588472,0.,-0.6038  
040232\B,-1.3056588472,0.,-0.6038040232\B,-0.917423311,0.9202399839,0.  
8953191819\B,0.917423311,0.9202399839,0.8953191819\B,0.917423311,-0.92  
02399839,0.8953191819\B,-0.917423311,-0.9202399839,0.8953191819\B,0.,0.  
,-1.6700461699\C,0.,0.,1.8457060266\C,0.,0.,3.3319213409\C,0.,1.20050  
50081,5.4397669924\C,0.,-1.2005050081,5.4397669924\C,0.,1.1994862885,4  
.04966443\C,0.,-1.1994862885,4.04966443\C,0.,0.,6.1425073845\H,0.,2.42  
36442419,-1.0151133343\H,0.,-2.4236442419,-1.0151133343\H,2.4240521808  
,0.,-1.0090287363\H,-2.4240521808,0.,-1.0090287363\H,-1.6800471071,1.6  
754353466,1.3992174648\H,1.6800471071,1.6754353466,1.3992174648\H,1.68  
00471071,-1.6754353466,1.3992174648\H,-1.6800471071,-1.6754353466,1.39  
92174648\H,0.,2.142684814,5.9742843177\H,0.,-2.142684814,5.9742843177\  
H,0.,2.1390015354,3.512106848\H,0.,-2.1390015354,3.512106848\H,0.,0.,7  
.2253725292\I,0.,0.,-3.8632166379\\Version=ES64L-G09RevD.01\State=1-A1  
\HF=-796.5196658\RMSD=8.718e-09\RMSF=7.574e-07\Dipole=0.,0.,2.3208486\  
Quadrupole=1.0576076,6.7873784,-7.844986,0.,0.,0.\PG=C02V [C2(H1C1C1C1  
B1I1),SGV(C4H6B2),SGV'(H2B2),X(H4B4)]\@

### 1q

1\1\GINC-LOCALHOST\FOpt\RB3LYP\def2TZVP\C1H8B9I1N2\PIOTR\28-May-2022\0\  
\#P B3LYP/Def2TZVP FOpt(tight) geom(noangle, nodistance) fcheck #P SC  
RF(Solvent=C6H5Cl)\1-CB8-1-N2, C4v\0,1\B,0.,-1.3347471347,-2.0306297  
046\B,-1.3347471347,0.,-2.0306297046\B,0.,1.3347471347,-2.0306297046\B  
,1.3347471347,0.,-2.0306297046\B,0.9289548242,-0.9289548242,-0.5577817

339\B,-0.9289548242,-0.9289548242,-0.5577817339\B,-0.9289548242,0.9289548242,-0.5577817339\B,0.9289548242,0.9289548242,-0.5577817339\B,0.,0.,0.5199130822\C,0.,0.,-2.9517218909\N,0.,0.,-4.3036225368\N,0.,0.,-5.4059615406\H,0.,-2.3813690678,-2.5742912056\H,-2.3813690678,0.,-2.5742912056\H,0.,2.3813690678,-2.5742912056\H,2.3813690678,0.,-2.5742912056\H,1.7135591676,-1.7135591676,-0.144484477\H,-1.7135591676,-1.7135591676,-0.144484477\H,-1.7135591676,1.7135591676,-0.144484477\H,1.7135591676,1.7135591676,-0.144484477\I,0.,0.,2.6761540013\\Version=ES64L-G09RevD.01\State=1-A1\HF=-674.1030955\RMSD=9.613e-09\RMSF=6.962e-07\Dipole=0.,0.,-3.9691643\Quadrupole=-7.9704019,-7.9704019,15.9408037,0.,0.,0.\PG=C04V [C4(N1N1C1B1I1),2SGV(H2B2),2SGD(H2B2)]\\@

### 1r

1\1\GINC-LOCALHOST\FOpt\RB3LYP\def2TZVP\C2H9B9N2O2\PIOTR\28-May-2022\0\\#P B3LYP/Def2TZVP FOpt(tight) geom(noangle, nodistance) fcheck #P SCRF(Solvent=C6H5Cl) freq(noraman, readIso)\N2-CB9H8-COOMe, Cs\\0,1\B,1.717171783,-0.2027877501,0.\B,-0.5320343541,-1.6137701471,0.\B,0.5895526652,-0.9026120345,1.3255443744\B,0.5895526652,-0.9026120345,-1.3255443744\B,0.5898052766,0.8526285984,-0.9236503327\B,0.5898052766,0.8526285984,0.9236503327\B,-0.9903367135,-0.1384089387,0.9244852797\B,-0.9903367135,-0.1384089387,-0.9244852797\B,1.1342123518,-1.771646225,0.\N,1.9115613145,-3.020514349,0.\N,2.4883374972,-3.9528984968,0.\C,-0.691236371,1.1395164618,0.\C,-1.4442770367,2.4267230408,0.\H,-3.1996774,3.1105226484,0.\O,-0.929893555,3.5164120042,0.\O,-2.7733122073,2.2374526749,0.\H,2.8822431676,0.0075911844,0.\H,-1.2293757492,-2.5706500131,0.\H,0.8195928716,-1.270412468,2.4271912271\H,0.8195928716,-1.270412468,-2.4271912271\H,0.9534007493,1.6827555283,-1.6794102061\H,0.9534007493,1.6827555283,1.6794102061\H,-1.893811092,-0.1089251685,1.6832824532\H,-1.893811092,-0.1089251685,-1.6832824532\\Version=ES64L-G09RevD.01\State=1-A'\HF=-565.6001205\RMSD=4.772e-09\RMSF=1.168e-05\Dipole=0.4156866,-2.002157,0.\Quadrupole=3.6966659,1.4872907,-5.1839566,-12.7102254,0.,0.\PG=CS [SG(C2H3B3N2O2),X(H6B6)]\\@

### 1s

1\1\GINC-LOCALHOST\FOpt\RB3LYP\def2TZVP\C7H14B9N1O2\PIOTR\28-May-2022\0\\#P B3LYP/Def2TZVP FOpt(tight) geom(noangle, nodistance) fcheck #P SCRF(Solvent=C6H5Cl)\PyrCB9COOH C1\\0,1\B,-1.7793159726,-0.3312457884,-1.2801687656\B,-1.7794996439,-1.2691412132,0.3054374401\B,-1.694786517,0.331234184,1.2490309895\B,-1.6943979198,1.2687164894,-0.3352158924\B,-0.2480713838,0.6079309168,-1.176851079\B,-0.3016681348,-1.1877406754,-0.7138735505\B,-0.2484895823,-0.7245195588,1.0784599325\B,-0.1828452606,1.0701192453,0.6148492109\B,0.8059882468,-0.0998970042,-0.0735579688\N,2.3307901012,-0.1596357809,-0.1080472562\C,3.0464363615,0.9454835342,-0.4031723421\C,4.4248193117,0.9211307801,-0.4415997389\C,5.0899274617,-0.2678681828,-0.169992682\C,4.3466004403,-1.4016231779,0.1333025772\C,2.9702410966,-1.317864664,0.1568047682\C,-2.666964215,0.0364637209,0.0061784318\C,-4.1479049537,0.1292442367,0.0637830329\O,-4.7526386098,-0.8944527959,-0.5681840278\O,-4.7646251887,1.0118245215,0.6095086066\H,-2.3153967347,-0.57176629,-2.3060606524\H,-2.3196326934,-2.2817946189,0.5898598944\H,-2.1686616174,0.6116662086,2.2949766956\H,-2.1706501035,2.3193386079,-0.5947274398\H,0.1766783325,1.1533927286,-2.1437338847\H,0.0791868844,-2.15599175,-1.2886818622\H,0.176165224,-1.3035399608,2.0256610949\H,0.2978618819,2.0046423007,1.1700597997\H,2.4757326484,1.8388032168,-0.6043771933\H,4.9622805829,1.8267561867,-0.6816882573\H,6.1702934857,-0.3102200755,-0.1941419693\H,4.8217534302,-2.3468767702,0.3509816823\H,2.3409457544,-2.164010344,0.385349247\H,-5.7116407132,-0.7642222276,-0.4868688238\\Version=ES64L-G09RevD.01\State=1-A'\HF=-704.4751241\RMSD=5.795e-09\RMSF=4.524e-06\Dipole=5.4647593,-0.8057736,-0.4897677\Quadrupole=26.0840477,-9.8724629,-16.2115848,5.5272991,3.2138448,-3.8992314\PG=C01 [X(C7H14B9N1O2)]\\@

### 1t

1\1\GINC-LOCALHOST\FOpt\RB3LYP\def2TZVP\C7H19B9O2S1\PIOTR\28-May-2022\



0\\#P B3LYP/Def2TZVP FOpt(tight) geom(noangle, nodistance) fcheck #P S  
CRF(Solvent=C6H5Cl) freq(noraman, readIso)\\10-ThiaCB9-1-COOH Cs\\0,1\  
B,2.0496566306,0.9206473927,1.226067885\\B,2.0496566306,-0.9206473927,1  
.226067885\\B,2.3309810815,-0.9175833923,-0.6174949545\\B,2.3309810815,0  
.9175833923,-0.6174949545\\B,0.7129138825,1.3101482077,0.0784358472\\B,0  
.7129138825,-1.3101482077,0.0784358472\\B,0.5149854803,0.,1.3817513628\  
B,0.9110406162,0.,-1.2181692521\\B,-0.3233846813,0.,-0.0734158175\\S,-2.  
1637443432,0.,-0.4167106597\\C,-2.836545187,1.3919792298,0.5635392289\\C  
, -2.836545187,-1.3919792298,0.5635392289\\C,-4.3544246549,1.2786943881,  
0.6695291857\\C,-4.3544246549,-1.2786943881,0.6695291857\\C,-4.818604408  
5,0.,1.3726941197\\C,3.1092696211,0.,0.4464744265\\C,4.5841278573,0.,0.6  
328060625\\O,4.9367928959,0.,1.9318355819\\O,5.3933410855,0.,-0.26229534  
49\\H,2.4347607288,1.6834177389,2.0428931326\\H,2.4347607288,-1.68341773  
89,2.0428931326\\H,2.9482782706,-1.6765919751,-1.2807726411\\H,2.9482782  
706,1.6765919751,-1.2807726411\\H,0.309670435,2.4257041585,0.0182276506  
\\H,0.309670435,-2.4257041585,0.0182276506\\H,-0.0679134991,0.,2.4177294  
276\\H,0.6519511515,0.,-2.3768801295\\H,-4.7049337509,-2.153133405,1.222  
8498631\\H,-4.7049337509,2.153133405,1.2228498631\\H,-2.5252458628,2.291  
8847729,0.0367014813\\H,-2.5252458628,-2.2918847729,0.0367014813\\H,-2.3  
507486329,1.3661199293,1.538578155\\H,-2.3507486329,-1.3661199293,1.538  
578155\\H,-4.7975434897,1.3424001047,-0.3282230288\\H,-4.7975434897,-1.3  
424001047,-0.3282230288\\H,-5.9084020909,0.,1.431153536\\H,5.9071716811,  
0.,1.9734243885\\H,-4.4501073206,0.,2.4035737012\\Version=ES64L-G09RevD  
.01\\State=1-A\\HF=-1050.926878\\RMSD=8.263e-09\\RMSF=2.108e-06\\Dipole=-4  
.9913318,0.,1.1520844\\Quadrupole=12.0243195,-2.8598618,-9.1644576,0.,7  
.8507128,0.\\PG=CS [SG(C3H5B3O2S1),X(C4H14B6)]\\@

## 1u

1\\1\\GINC-LOCALHOST\\FOpt\\RB3LYP\\def2TZVP\\C16H24B9I1O1\\PIOTR\\13-Jan-2023  
\\0\\#P B3LYP/Def2TZVP FOpt(tight) geom(noangle, nodistance) fcheck #P  
SCRf(Solvent=C6H5Cl)\\10-Phi-CB9H8-1-CH2CH2-PhOMe, C1\\0,1\\B,2.4063466  
954,0.888340431,1.2364911108\\B,2.2117734649,-0.7700143664,-0.798670173  
4\\B,2.3113997628,-0.9691471671,1.044786607\\B,2.300243285,1.0852530549,  
-0.6055766889\\B,0.8725840952,1.4137680088,0.4376016065\\B,0.8869672721,  
-0.0158506415,1.5961540655\\B,0.7442045479,-1.1683782977,0.1712479736\\B  
,0.743846992,0.2638737161,-0.9858544341\\B,3.3311889535,0.0132781844,0.  
1608562699\\C,-0.1286586171,0.1612566072,0.3632448135\\H,2.8986326497,1.  
5678718772,2.0770055936\\H,2.5448607276,-1.4853449248,-1.68724902\\H,2.7  
276727451,-1.852429765,1.721261393\\H,2.7164860477,1.9288576554,-1.3312  
54031\\H,0.4184577056,2.4985201455,0.5831754528\\H,0.4404995788,-0.10739  
07111,2.6900052396\\H,0.1891114199,-2.2125262298,0.0914992531\\H,0.20252  
39632,0.3969849694,-2.0289935936\\C,-3.923632147,0.1714049619,-0.572765  
4148\\C,-4.6231615444,1.3814029269,-0.5045784608\\C,-4.6528750768,-1.001  
2558178,-0.3971137536\\C,-5.9872851129,1.4180173715,-0.2681181362\\C,-6.  
0261696934,-0.9875573756,-0.1580012726\\C,-6.7011976274,0.2299332616,-0  
.0911286117\\C,-1.637707787,0.2170780888,0.5170549121\\C,-2.4315455215,0  
.1440353199,-0.7984742852\\O,-8.0403134564,0.361592143,0.1332417937\\C,-  
8.8160370942,-0.8159017934,0.317895847\\H,-4.089311778,2.3146263101,-0.  
645219454\\H,-4.1453524786,-1.9579528243,-0.4512514499\\H,-6.5199080618,  
2.3594797788,-0.2225665328\\H,-6.5507170221,-1.9234541795,-0.0320734023  
\\H,-1.9512210617,-0.6065872322,1.162371873\\H,-1.9044173977,1.137492186  
9,1.0413064123\\H,-2.1558471851,-0.7691965649,-1.3310254274\\H,-2.142432  
8632,0.9798398871,-1.43872614\\H,-8.4772184955,-1.3835079313,1.18870524  
29\\H,-9.8368534306,-0.4794275491,0.4820703676\\H,-8.784024588,-1.456994  
0771,-0.5671600802\\I,5.5294762105,-0.0934493294,-0.0619199384\\C,6.1823  
86213,0.0546813476,1.959849287\\C,6.2584738137,-1.1031606226,2.7188098  
19\\C,6.527647618,1.3034444728,2.4535902192\\C,6.6969301595,-0.994786563  
2,4.0354030359\\H,5.9835421385,-2.0646858683,2.3099425332\\C,6.965539206  
6,1.3877743384,3.7722873552\\H,6.4573909669,2.1909428415,1.8413788808\\C  
,7.0491029411,0.2443608571,4.5588981156\\H,6.760233146,-1.8851868464,4.  
6469836813\\H,7.237564124,2.3529827015,4.1788504572\\H,7.3890738779,0.31  
9226003,5.5834450389\\Version=ES64L-G09RevD.01\\State=1-A\\HF=-1221.2658  
389\\RMSD=1.931e-09\\RMSF=2.482e-06\\Dipole=3.4397209,-0.6007605,1.300650

5\Quadrupole=30.8840058,-15.9326111,-14.9513947,11.3376492,10.3597353,  
0.1983261\PG=C01 [X(C16H24B9I1O1)]\@

**1v**

1\1\GINC-LOCALHOST\FOpt\RB3LYP\def2TZVP\C10H19B9I1O1(1-)\PIOTR\29-May-2022\0\#P B3LYP/Def2TZVP FOpt(tight, RCFC) geom(noangle, nodistance) fcheck #P SCRF(Solvent=C6H5Cl) guess=check\10-I-CB9H8-1-CH2CH2-PhOMe, C1\1\B,-1.5195343513,2.5488373203,0.1093251412\B,1.070210978,2.2527759262,-0.0617566846\B,-0.1444542249,2.3505688588,1.3247268562\B,-0.30820652,2.4519467747,-1.2796542263\B,-1.3609200094,1.0490468655,-0.88111292\B,-1.248104784,0.9784289828,0.9464519005\B,0.5711868127,0.7700582588,0.8264528076\B,0.4549784741,0.8418525136,-1.003136645\B,-0.1016735215,3.4590299386,0.0571914778\C,-0.5044592212,-0.03256691,-0.0546185356\H,-2.581475745,3.0789098049,0.1967808839\H,2.2248049443,2.5347192943,-0.124393474\H,-0.0287252636,2.7085490512,2.4538510269\H,-0.3290537659,2.9026568598,-2.381003243\H,-2.2206388485,0.6587065767,-1.601218762\H,-2.0107388791,0.5290180028,1.7380275048\H,1.3120864633,0.1541564784,1.5207997935\H,1.1095609561,0.3047131511,-1.832090844\C,0.0279787274,-3.8326899461,-0.8044431327\C,-0.8551682319,-4.482097523,-1.6742151315\C,0.6525497919,-4.6077930386,0.1688518256\C,-1.1032367018,-5.8415219568,-1.5751370066\C,0.4177919084,-5.9770797407,0.2865874058\C,-0.4674288996,-6.6012386422,-0.5901713447\C,-0.7200983869,-1.5337733928,-0.044780397\C,0.2689609201,-2.3458853436,-0.8985163811\O,-0.769760537,-7.9326417263,-0.5689199619\C,-0.1415851861,-8.7538924037,0.4065682748\H,-1.3553519402,-3.9120307778,-2.4491407062\H,1.3476916783,-4.1395381855,0.8568126957\H,-1.7851381455,-6.3342878879,-2.2566794412\H,0.9294746943,-6.5376258136,1.05539368\H,-0.6592882348,-1.8867817673,0.9878935464\H,-1.7371934918,-1.7496328139,-0.3816302336\H,1.2877648483,-2.1181734804,-0.5761660001\H,0.1921831361,-2.0268033798,-1.939992982\H,-0.39513552,-8.433912848,1.4209134582\H,-0.520680559,-9.7595865228,0.2412229552\H,0.9454374086,-8.7528045217,0.2882736127\I,0.1575025972,5.6380748039,0.1272200062\Version=ES64L-G09RevD.01\State=1-A\HF=-989.7443839\RMSD=1.920e-09\RMSF=1.586e-06\Dipole=0.2843482,-6.0151161,0.0641702\Quadrupole=10.2533099,-21.9812389,11.727929,-5.5092885,2.2700472,-10.8272529\PG=C01 [X(C10H19B9I1O1)]\@

**1w**

1\1\GINC-LOCALHOST\FOpt\RB3LYP\def2TZVP\C1H9B9N2\PIOTR\28-May-2022\0\#P B3LYP/Def2TZVP FOpt(tight) geom(noangle, nodistance) fcheck #P SCRF(Solvent=C6H5Cl) freq(noraman, readIso)\1-CB9-10-B2, C4v\0,1\B,-1.3251243334,0.,-0.0861763691\B,0.,1.3251243334,-0.0861763691\B,1.3251243334,0.,-0.0861763691\B,0.,-1.3251243334,-0.0861763691\B,-0.9260112101,-0.9260112101,1.4085175588\B,-0.9260112101,0.9260112101,1.4085175588\B,0.9260112101,-0.9260112101,1.4085175588\C,0.,0.,2.3238889732\B,0.,0.,-1.111144137\N,0.,0.,-2.5796952869\N,0.,0.,-3.6767706249\H,0.,0.,3.4002370447\H,-2.4261919036,0.,-0.5238310467\H,0.,2.4261919036,-0.5238310467\H,2.4261919036,0.,-0.5238310467\H,0.,-2.4261919036,-0.5238310467\H,-1.6833398909,-1.6833398909,1.9091238258\H,-1.6833398909,1.6833398909,1.9091238258\H,1.6833398909,1.9091238258\H,1.6833398909,-1.6833398909,1.9091238258\Ver  
sion=ES64L-G09RevD.01\State=1-A\HF=-376.9483315\RMSD=2.463e-09\RMSF=3.089e-06\Dipole=0.,0.,-1.2731957\Quadrupole=-4.559658,-4.559658,9.119316,0.,0.,0.\PG=C04V [C4(H1C1B1N1N1),2SGV(H2B2),2SGD(H2B2)]\@

**1x**

1\1\GINC-LOCALHOST\FOpt\RB3LYP\def2TZVP\C6H14B9N1\PIOTR\05-Apr-2023\0\#P B3LYP/Def2TZVP FOpt(tight) geom(noangle, nodistance) fcheck #P SCRF(Solvent=C6H5Cl) freq(NoRaman)\10-CB9-1-Pyridine, C2v\0,1\B,-1.3056029941,0.,-2.4529090059\B,1.3056029941,0.,-2.4529090059\B,0.,1.3042732213,-2.4528887575\B,0.,-1.3042732213,-2.4528887575\B,-0.9267186632,-0.9246561803,-0.9541338169\B,-0.9267186632,0.9246561803,-0.9541338169\B,0.9267186632,0.9246561803,-0.9541338169\B,0.9267186632,-0.9246561803,-0.9541338169\C,0.,0.,-3.3755630666\B,0.,0.,0.0993656094\N,0.,0.,1.6271

```

040354\C,-1.1966665984,0.,3.6851187598\C,1.1966665984,0.,3.6851187598\
C,-1.1657565354,0.,2.3061224947\C,1.1657565354,0.,2.3061224947\C,0.,0.
,4.3904755274\H,-2.379153128,0.,-2.9541548796\H,2.379153128,0.,-2.9541
548796\H,0.,2.3794195369,-2.9504167572\H,0.,-2.3794195369,-2.950416757
2\H,-1.7088408471,-1.7119966793,-0.5254077837\H,-1.7088408471,1.711996
6793,-0.5254077837\H,1.7088408471,1.7119966793,-0.5254077837\H,1.70884
08471,-1.7119966793,-0.5254077837\H,0.,0.,-4.45164418\H,-2.1506838116,
0.,4.1916236043\H,2.1506838116,0.,4.1916236043\H,-2.0622402067,0.,1.70
57358773\H,2.0622402067,0.,1.7057358773\H,0.,0.,5.4719618256\Version=
ES64L-G09RevD.01\State=1-A\HF=-515.8205502\RMSD=5.823e-09\RMSF=1.422e
-06\Dipole=0.,0.,4.7225149\Quadrupole=-3.1331776,-12.223185,15.3563626
,0.,0.,0.\PG=C02V [C2(H1C1B1N1C1H1),SGV(C4H6B2),SGV'(H2B2),X(H4B4)]\@

```

## 1y

```

1\1\GINC-LOCALHOST\FOpt\RB3LYP\def2TZVP\C3H15B9N2\PIOTR\30-May-2022\0\
\#P B3LYP/Def2TZVP FOpt(tight, RCFC) geom(noangle, nodistance) fcheck
#P SCRF(Solvent=C6H5Cl)\CB9-10-acemtamidinium, C1\0,1\B,-2.048976335
4,1.1196314767,0.7968264629\B,-2.4317831991,-0.9240652218,-0.778017139
9\B,-2.1143910239,0.8664511374,-1.0388696656\B,-2.3697780598,-0.672480
8721,1.0505455992\B,-0.723941179,0.0159247279,1.2905977097\B,-0.535965
3259,1.1035690814,-0.1908407064\B,-0.8133816713,-0.3418102161,-1.30440
41061\B,-0.9869422052,-1.430777956,0.1761046202\B,0.2908873557,-0.3533
702371,-0.0171497833\C,-3.1506343853,0.2629170151,0.0167519435\H,-2.38
04031488,2.0567850797,1.4422046606\H,-3.0791204148,-1.6826225751,-1.41
82392136\H,-2.4965847078,1.5974234791,-1.8897743201\H,-2.96505396,-1.2
234601187,1.9144454747\H,-0.2645511092,0.0921457597,2.3851416175\H,0.0
157309811,2.1490471604,-0.3565465523\H,-0.42926628,-0.5695099165,-2.40
6858624\H,-0.7523702732,-2.5884797314,0.32762169\H,-4.2090775949,0.456
8381267,0.0268278909\H,1.9547340151,-1.7160016659,-0.0182478997\N,1.74
9586655,-0.7271324918,-0.0184366796\C,2.8143709699,0.0390109434,0.0010
818738\C,4.184874126,-0.5599468502,0.021402249\N,2.7119545526,1.359353
4011,0.0025168789\H,4.1395541361,-1.6451637437,0.0578449692\H,4.733529
5365,-0.2586155889,-0.8722699457\H,4.735234583,-0.2001247674,0.8916850
357\H,1.805647861,1.8070873971,-0.0384890556\H,3.5369821016,1.93351416
71,0.015651016\Version=ES64L-G09RevD.01\State=1-A\HF=-456.8711847\RMS
D=5.828e-09\RMSF=4.072e-06\Dipole=4.9445771,0.4458006,-0.0063061\Quadr
upole=17.8784457,-4.7266497,-13.151796,0.4894296,-0.0387289,-0.0678508
\PG=C01 [X(C3H15B9N2)]\@

```

## 9. References

1. Z. Otwinowski and W. Minor, in *Methods in Enzymology*, eds. J. C. W. Carter and R. M. Sweet, Academic Press, 1997, vol. 276, pp. 307–326.
2. COLLECT, Data Collection Strategy Program, Nonius (1999).
3. G. M. Sheldrick, SHELXS-97, Program for crystal structure solution, University of Göttingen, (1997).
4. G. M. Sheldrick, SHELXL-97, Program for crystal structure refinement, University of Göttingen,(1997).
5. T. Jelinek, C. A. Kilner, M. Thornton-Pett and J. D. Kennedy, *Chem. Commun.*, 2001, 1790–1791.
6. S. G. McArthur, R. Jay, L. Geng, J. Guo and V. Lavallo, *Chem. Commun.*, 2017, **53**, 4453–4456.
7. C. Hansch, A. Leo and R. W. Taft, *Chem. Rev.*, 1991, **91**, 165–195.
8. R. Zurawinski, R. Jakubowski, S. Domagała, P. Kaszyński and K. Woźniak, *Inorg. Chem.*, 2018, **57**, 10442–10456.
